# 1 **Translating deep learning to neuroprosthetic control**

2 Darrel R. Deo<sup>1,2,3</sup>, Francis R. Willett<sup>1,3,4</sup>, Donald T. Avansino<sup>4</sup>, Leigh R. Hochberg<sup>7-11</sup>, Jaimie M.  
3 Henderson<sup>1,2\*\*</sup>, and Krishna V. Shenoy<sup>2-6\*\*</sup>

4  
5 <sup>1</sup> Department of Neurosurgery, Stanford University, Stanford, CA, USA.

6 <sup>2</sup> Wu Tsai Neurosciences Institute, Stanford University, Stanford, CA, USA.

7 <sup>3</sup> Department of Electrical Engineering, Stanford University, Stanford, CA, USA.

8 <sup>4</sup> Howard Hughes Medical Institute at Stanford University, Stanford, CA, USA.

9 <sup>5</sup> Department of Bioengineering, Stanford University, Stanford, CA, USA.

10 <sup>6</sup> Department of Neurobiology, Stanford University, Stanford, CA, USA.

11 <sup>7</sup> School of Engineering, Brown University, Providence, RI, USA.

12 <sup>8</sup> Carney Institute for Brain Science, Brown University, Providence, RI, USA.

13 <sup>9</sup> VA RR&D Center for Neurorestoration and Neurotechnology, Rehabilitation R&D Service, Providence  
14 VA Medical Center, Providence, RI, USA.

15 <sup>10</sup> Department of Neurology, Harvard Medical School, Boston, MA, USA.

16 <sup>11</sup> Center for Neurotechnology and Neurorecovery, Dept. of Neurology, Massachusetts General Hospital,  
17 Boston, MA, USA.

18  
19 \*\*These authors contributed equally to this work

20 Corresponding author: [ddeo@stanford.edu](mailto:ddeo@stanford.edu)

## 21 22 **Abstract**

23 Advances in deep learning have given rise to neural network models of the relationship between movement  
24 and brain activity that appear to far outperform prior approaches. Brain-computer interfaces (BCIs) that  
25 enable people with paralysis to control external devices, such as robotic arms or computer cursors, might  
26 stand to benefit greatly from these advances. We tested recurrent neural networks (RNNs) on a challenging  
27 nonlinear BCI problem: decoding continuous bimanual movement of two computer cursors. Surprisingly,  
28 we found that although RNNs appeared to perform well in offline settings, they did so by overfitting to the  
29 temporal structure of the training data and failed to generalize to real-time neuroprosthetic control. In  
30 response, we developed a method that alters the temporal structure of the training data by  
31 dilating/compressing it in time and re-ordering it, which we show helps RNNs successfully generalize to the  
32 online setting. With this method, we demonstrate that a person with paralysis can control two computer  
33 cursors simultaneously, far outperforming standard linear methods. Our results provide evidence that  
34 preventing models from overfitting to temporal structure in training data may, in principle, aid in translating  
35 deep learning advances to the BCI setting, unlocking improved performance for challenging applications.

## 36 37 **Introduction**

38 Rapid progress in machine learning and artificial intelligence has led to an impressive collection of neural  
39 network models capable of learning complex nonlinear relationships between large amounts of data (these  
40 approaches have been referred to as “deep learning”). Deep learning algorithms have produced significant  
41 success in a wide variety of applications<sup>1</sup> including, computer vision<sup>2-4</sup>, natural language processing<sup>5-7</sup>, and  
42 robotics<sup>8-10</sup>. More recently, a promising application of neural networks has been towards modeling and  
43 decoding the brain activity associated with movement via brain-computer interfaces (BCIs), which holds  
44 great potential for improving performance of BCI systems. However, this intersection of deep learning and  
45 BCIs presents some unique challenges, including the often-limited quantity of data and changes in the  
46 distribution of data from the offline (open-loop) to online (real-time closed-loop control) settings.

47  
48 Intracortical BCIs are systems that aim to restore movement and communication to people with paralysis  
49 by decoding movement signals from the brain via microelectrodes placed in the cortex. Advancements in  
50 clinical research BCIs have enabled functional restoration of movement and communication, including  
51 robotic arm control<sup>11-14</sup>, reanimation of paralyzed limbs through electrical stimulation<sup>15-19</sup>, cursor control<sup>20-  
52 22</sup>, decoding speech<sup>23-27</sup>, and most recently, decoding handwriting<sup>28</sup>. An abundance of prior work suggests  
53 that BCI decoding may be improved through neural networks, as demonstrated in various offline settings<sup>29-</sup>

54 <sup>35</sup>. To date, however, there are only a few demonstrations of continuous online BCI control using neural  
55 networks, most of which are restricted to nonhuman primate (NHP) studies<sup>36,37</sup> given the rarity of real-time  
56 human BCI data. Many prior motor decoding algorithms for real-time neuroprosthetic control – which  
57 convert movement-related brain activity into continuous control signals – have been based on linear  
58 methods<sup>13,38–43</sup>. Here, we apply a neural network for real-time neuroprosthetic control to assess whether it  
59 can generate advances in performance as suggested by prior work.

60  
61 Of the many network architectures, recurrent neural networks (RNNs) have been a popular decoding  
62 approach for BCIs<sup>29,33,36</sup> since they can learn temporal dependence within data, aligned with the dynamical  
63 systems view that neural activity in the motor cortex evolves over time<sup>29,44,45</sup>. However, RNNs often require  
64 large amounts of training data and can overfit to the temporal structure within offline data which may not be  
65 present in online data, potentially reducing their utility as decoders for BCI applications. In this study, we  
66 investigate the usage and application of RNNs on a challenging nonlinear BCI problem: controlling two  
67 cursors simultaneously via decoded bimanual movement.

68  
69 Prior studies have shown that motor cortex contributes to both contralateral and ipsilateral movements and  
70 that neural tuning changes nonlinearly between single and dual-limb movements<sup>46–51</sup>. More specifically,  
71 during dual movement we found that the neural representation for one effector (‘primary’) stays relatively  
72 constant, whereas the other effector’s (‘secondary’) representation gets suppressed while its directional  
73 tuning changes. Additionally, there is significant correlation in how movement direction is represented for  
74 contralateral and ipsilateral movements. To date, studies that have investigated bimanual BCI  
75 control<sup>41,46,52,53</sup> have mainly used linear decoding algorithms (e.g., Kalman filters and ridge regression)  
76 despite the seemingly nonlinear relationship between neural activity and bimanual movement. The need  
77 for exploration of nonlinear decoding methods for bimanual movement makes this problem an apt  
78 application and testbed for RNNs.

79  
80 Here, we demonstrate a surprising finding: that RNN decoders calibrated on stereotyped training data  
81 achieve high offline performance (consistent with prior work<sup>33,54–56</sup>), but do so in part by overfitting to the  
82 temporal structure of the task, resulting in poor performance when used for online, real-time control of a  
83 BCI. To solve this problem, we altered the stereotyped structure in training data to introduce temporal and  
84 behavioral variability which helps RNNs generalize to the online setting. In addition, we show that RNNs  
85 can leverage nonlinearities within the neural code governing complex bimanual movements to accomplish  
86 simultaneous two-cursor control, outperforming linear methods. Overall, our findings suggest that  
87 preventing overfitting to temporal structure within training data can help translate advances in deep learning  
88 to improve BCI performance on challenging nonlinear problems.

## 89 90 **Results**

### 91 **Nonlinear neural coding of directional unimanual and bimanual hand movement**

92 We first sought to understand how bimanual hand movements are represented in motor cortex, including  
93 sources of nonlinearity that would motivate the use of RNNs. We used microelectrode recordings from the  
94 hand knob area of the left (dominant) precentral gyrus in a clinical trial participant (referred to as T5) to  
95 characterize how neural tuning changes between bimanual hand movement (both hands attempting to  
96 move simultaneously) and unimanual hand movement (one hand moving individually). T5 has a C4 spinal  
97 cord injury and is paralyzed from the neck down; attempted movement resulted in little to no motion of the  
98 arms and legs (see Willett\*, Deo\*, et al. 2020 for more details<sup>50</sup>). T5 was instructed to attempt hand  
99 movements.

100  
101 Using a delayed movement task (Fig. 1a), we measured T5’s neural modulation to attempted unimanual  
102 and bimanual hand movements. We observed changes in neural spiking activity across many individual  
103 electrodes as a function of movement direction during bimanual movements (Fig. 1b presents an example  
104 electrode’s responses; see Supplementary Fig. 1 for a count of tuned electrodes). We also observed  
105 nonlinear changes in tuning from the unimanual to bimanual context, including tuning suppression and  
106

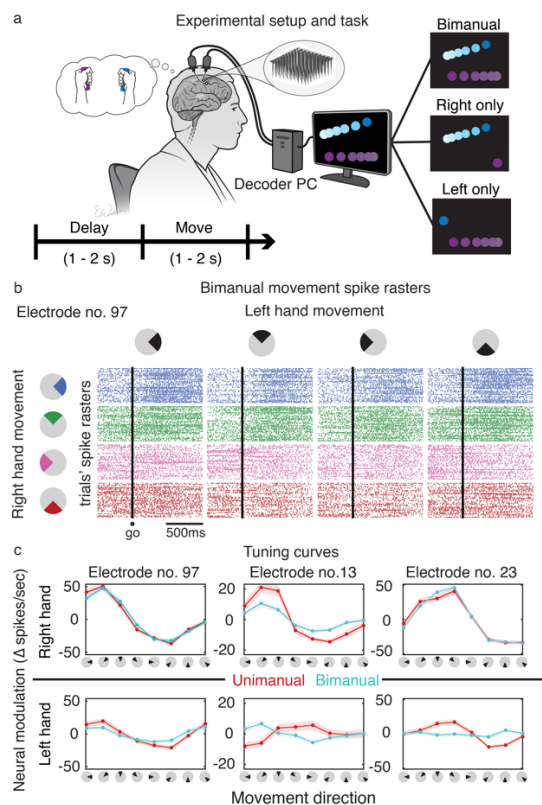

**Fig. 1 | Neural tuning to unimanual and bimanual hand movement.** **a** Participant T5 performed a delayed-movement task. Cursors on a screen prompted T5 to attempt to make concomitant joystick movements. One of three types of movements were cued on each trial: (1) *bimanual*: both hands, (2) *unimanual left*: only left (ipsilateral) hand, or (3) *unimanual right*: only right (contralateral) hand. **b** Matrix of spike rasters of example electrode no. 97 during bimanual movements. Raster plot ( $i, j$ ) of the matrix corresponds to electrode 97's response to right hand movement in direction  $i$  while the left hand moved in direction  $j$  (colored by right hand direction). Each row of a raster plot represents a trial and each column is a millisecond time-bin. A dot indicates a threshold crossing spike at the corresponding trial's time-bin. Different spiking activity can be seen for different bimanual movements, indicating tuning to bimanual movement direction. **c** Tuning curves of example electrodes show a range of tuning changes to each hand (rows) across movement contexts (red/blue). Solid dots indicate the mean firing rates (zero-centered) for movements in the directions indicated on the x-axes. Spikes were binned (20-ms bins) and averaged within a 300-700 ms window after the 'go' cue. Shaded areas are 95% CIs (computed via bootstrap resampling). Electrode no. 97 retained tuning for both hands between contexts, electrode no. 13 had suppressed tuning for both hands during bimanual movement, and electrode no. 23 had suppression in left hand tuning during bimanual movement.

direction changes (Fig. 1c). Here, 'nonlinear' is considered any departure from linear tuning to the variables we intend to decode: the  $x$ - and  $y$ -components of movement direction<sup>41</sup>, as described in the encoding model (equation 1) below:

$$f = b_0 + b_{rx}d_{rx} + b_{ry}d_{ry} + b_{lx}d_{lx} + b_{ly}d_{ly} \quad (1)$$

Here,  $f$  is the average firing rate of a neuron, the  $d$  terms are the  $x$ - and  $y$ -direction components of the right ( $d_{rx}$ ,  $d_{ry}$ ) and left ( $d_{lx}$ ,  $d_{ly}$ ) hand velocities, and the  $b$  terms are the corresponding coefficients of the velocity components (and  $b_0$  is the baseline firing rate). Tuning angle changes ("decorrelation") and a suppressed tuning magnitude from unimanual to bimanual movement breaks linearity, since the tuning coefficients change based on movement context. In addition, direction-independent laterality tuning (i.e., coding for the side of the body irrespective of movement direction) is another potential key source of nonlinearity. For clarity, Figure 2a illustrates these three nonlinear phenomena (decorrelation, suppression, and laterality tuning) with a schematic.

Tuning decorrelation and a suppression of ipsilateral related neural activity have been seen previously during bimanual movement<sup>47,50</sup>. These phenomena can be reproduced even with a richer set of continuous

138 directional movements (Fig. 2b). The tuning strength of right hand (primary effector) directional movements  
139 remained relatively unchanged from unimanual to bimanual contexts (12% suppression during bimanual),  
140 whereas tuning strength of the left hand (secondary effector) was suppressed by 34% during bimanual  
141 movement. Similarly, directional tuning (Fig. 2c) of the right hand remained relatively unchanged (0.87 and  
142 0.84 correlations for x- and y-directions, respectively) while left hand directional tuning changed more  
143 substantially (0.42 and 0.45 correlations for x- and y-directions, respectively) from the unimanual to  
144 bimanual context. These results indicate that neural tuning to left hand movements exhibited suppression  
145 and decorrelation when moved simultaneously with the right hand, whereas tuning to right hand movements  
146 remained mostly unchanged.

147

### 148 **A large neural dimension codes for laterality of the hand**

149 Also consistent with our prior work, we found a salient laterality-related neural dimension (Fig. 2d) coding  
150 for the side of the body that the hand resides independent of the movement direction. We used principal  
151 component analysis (PCA) on both unimanual and bimanual neural data to visualize neural activity in the  
152 top principal components (PCs). A dimension emerged within the top two PCs clearly separating right from  
153 left hand unimanual movements. Interestingly, bimanual neural activity most closely resembled that of  
154 unimanual right hand activity in the top PCs, further indicating that the right hand is more strongly  
155 represented than the left hand during bimanual movement in the contralateral precentral gyrus. Next, we  
156 used demixed PCA<sup>57</sup> (dPCA), which decomposes neural data into a set of dimensions that each explain  
157 variance related to one marginalization of the data, to quantify the size of the laterality factor in unimanual  
158 movement data only. We marginalized the data according to the following factors: time, laterality, movement  
159 direction, and the laterality-direction interaction. The laterality marginalization contained the highest fraction  
160 of variance (39% marginalized variance) indicating that tuning to laterality was stronger than tuning to  
161 direction (30% marginalized variance). From a decoding perspective, laterality dimensions can be useful in  
162 distinguishing right hand movements from left hand movements in a unimanual context.

163

164 Overall, we found a strong presence of nonlinearities within the neural code governing bimanual hand  
165 movement, making this a well suited application for RNN decoding.

166

### 167 **RNNs overfit to the temporal structure of offline data and generate overly stereotyped online 168 behavior**

169 Next, we used a simple RNN architecture (Fig. 3a and supplementary Fig. 2) – similar to the neural network  
170 model used in our recent report on decoding attempted handwriting<sup>28</sup> – to decode bimanual movement from  
171 neural activity. During RNN calibration, neural activity was recorded while T5 attempted movements in  
172 concert with one or both cursors moving on a screen. The structure of this task followed a delayed  
173 movement paradigm where T5 *prepared* to move during a delay period, executed movement during a *move*  
174 period, and then rested at an *idle* state. This highly stereotyped temporal structure (*prepare-move-idle*) is  
175 typical of BCI calibration tasks in which neural activity can be regressed against the inferred behavior. The  
176 RNN was trained to convert neural activity into (1) left and right cursor velocities and (2) discrete movement-  
177 context signals that denoted the category of movement being made at each moment in time (unimanual  
178 left, unimanual right, bimanual, or no movement). During closed-loop cursor control, the discrete context  
179 signals were used to gate the output cursor velocities. Velocity targets for RNN training were modified by  
180 introducing a reaction time and saturating the velocity curve (Fig. 3b) to better approximate the participant's  
181 intention to move maximally when far from the target<sup>58</sup>.

182

183 To investigate the RNN's decoding efficacy, we first focused on the unimanual movement case, which  
184 mitigates decoding challenges due to suppressed left-hand representation during bimanual movement.  
185 RNNs trained on open-loop unimanual movements achieved high offline decoding performance for both  
186 hands (Fig. 3d; average correlation of 0.9 and 0.83 for the right and left hand, respectively). Surprisingly,  
187 however, these RNNs generated pulse-like movements reflecting the velocity profiles used for offline  
188 training, making subsequent closed-loop online control difficult (Fig. 3e). Instead of being able to smoothly



a Nonlinear coding of dual-hand movement

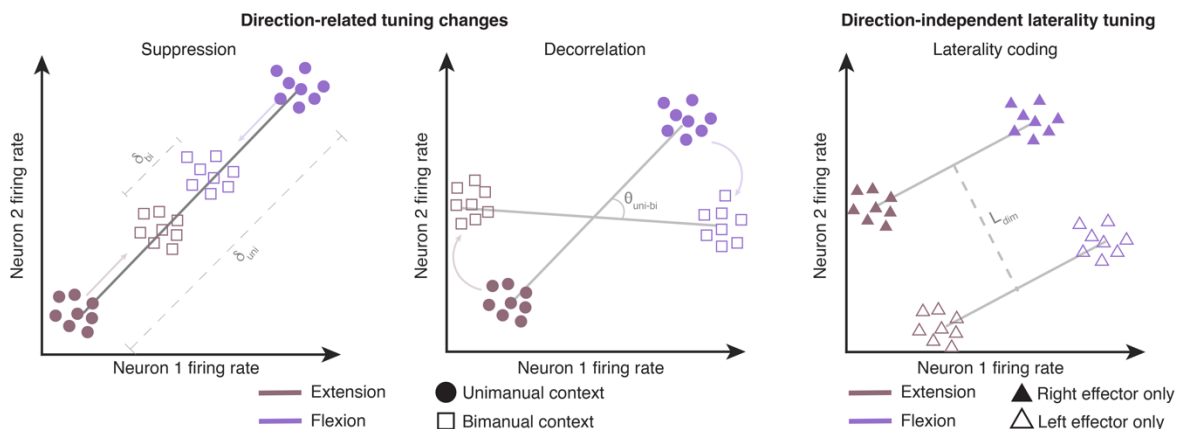

b Tuning suppression

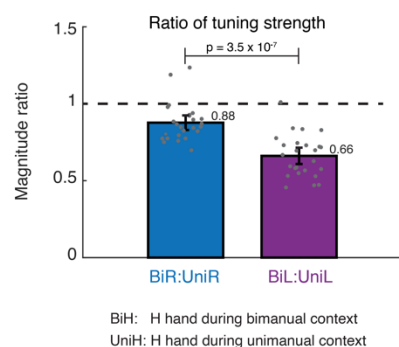

c Tuning decorrelation

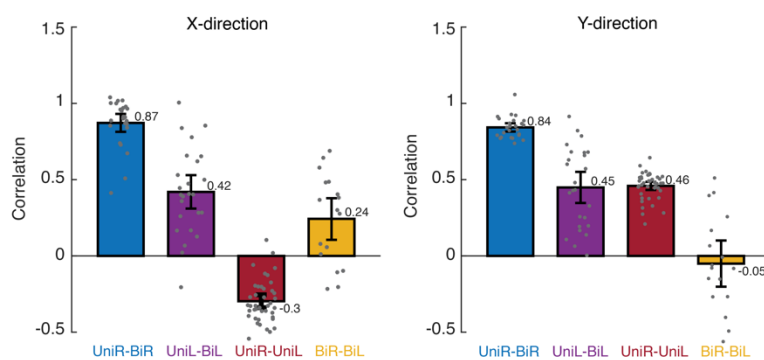

d Laterality coding

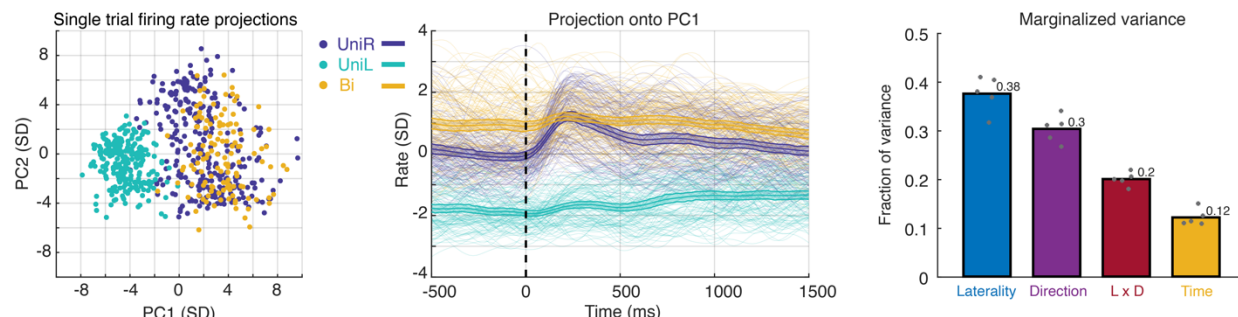

189

190

191

192

193

194

195

196

197

198

199

200

201

202

203

204

205

206

**Fig. 2 | Nonlinear neural code underlying bimanual hand movement.** **a** Cartoon examples of three key sources of nonlinearity in the neural coding of directional bimanual and unimanual movement. Firing rates for two exemplary neurons are plotted for flexion (purple) and extension (brown) of an effector (left and middle panels) during unimanual and bimanual contexts, or for two effectors (right panel) during unimanual movement. Direction-related tuning changes consist of suppression (reduction in neural distance between movement representations), and decorrelation (change in tuning axis) between unimanual and bimanual contexts. Direction-independent laterality tuning can be viewed as a large dimension separating movements between effectors on opposite sides of the body. **b** Amount of tuning suppression in offline data. Each bar indicates the mean ratio of tuning strength between bimanual and unimanual contexts for right (blue) and left (purple) hand movement. Significance was determined by a 2-sample t-test. All black intervals on bar plots indicate 95% CIs. Left hand tuning was suppressed more during the bimanual context than right hand tuning. **c** Degree of tuning decorrelation in offline data. Each bar indicates the correlation between the neural population's x- or y-direction coefficient vectors for pairs of movement types. See Supplementary Table 1 for p values. Right hand directional tuning remained largely unchanged while left hand directional tuning changed more substantially during the bimanual context. **d** Laterality information in offline data. Principal component analysis (PCA) on single trial Z-scored firing rates (SD denotes standard deviation) is used to visualize how movement types cluster (left panels; each dot and line is a single trial). Demixed PCA was used to compute the marginalized variance of different movement factors (right panel). Tuning to laterality was stronger than tuning to movement direction.

207 correct for inevitable errors that occur during online control, T5 had to make repeated attempted movements  
208 – mimicking the *prepare-move-idle* offline behavior – in succession to successfully acquire targets. In this  
209 scenario, offline RNN decoding on held-out test data yielded deceptively high performance which did not  
210 translate to high online performance.

### 211 212 **Fracturing the stereotyped temporal structure of open-loop training data helps RNNs transfer to** 213 **online control**

214 Since the RNN decoders overfit to the stereotyped *prepare-move-idle* open-loop behavior, we hypothesized  
215 that introducing variability in the temporal and behavioral structure of the training data would help generalize  
216 to the closed-loop context. To accomplish this, we developed a simple method whereby we alter the training  
217 data by randomly selecting snippets of data (ranging between 200-800ms in duration), stretching or  
218 compressing the snippets in time using linear interpolation, and then shuffling the order of the modified  
219 snippets (Fig. 3c; see Methods). This approach aims to intermix variable size windows of neural activity  
220 across the various stages of behavior (*prepare*, *move*, and *idle*) to make the RNN decoder more robust to  
221 the rapid changes in movement direction that occur during closed-loop control. Comparing the RNN trained  
222 with temporally altered data (*altRNN*) to that trained with raw data (*rawRNN*) as described in the previous  
223 section, the *altRNN* did not overfit to the open-loop task structure, which resulted in slightly poorer decoding  
224 performance on offline held-out test data and the decoded output velocities appeared generally noisier (Fig.  
225 3d). However, the *altRNN* led to improved closed-loop control (see Supplementary Movie 4). The decoded  
226 cursor speeds were more continuous in nature and did not overfit to the pulse-like velocity profiles  
227 prescribed to the cursors during the open-loop task (Fig. 3e).

228  
229 In addition to enforcing that the RNN generalizes to data with less stereotyped structure, this data alteration  
230 technique allows for synthetic data generation which also helps to prevent overfitting to the limited amount  
231 of data that can be collected in human BCI research. Overall, we found that fracturing temporal and  
232 behavioral structure in the training data resulted in more continuous output velocities which translated to  
233 better closed-loop cursor control performance.

### 234 235 **RNN decoders enable online simultaneous control of two cursors**

236 Next, we tested whether an RNN decoder trained with temporally altered data could facilitate real-time  
237 neural control of two cursors at the same time – a challenging nonlinear decoding problem. To do so, we  
238 trained an RNN on offline and online unimanual and bimanual hand movements collected over multiple  
239 sessions (see Methods). T5 attempted a series of unimanual or bimanual hand movements to drive two  
240 cursors to their intended targets. To acquire targets, the cursors had to dwell within their corresponding  
241 target for 500 ms, simultaneously. T5 was asked to attempt all bimanual trials with simultaneous hand  
242 movements (as opposed to sequential unimanual movement of one cursor at a time). T5 successfully  
243 achieved bimanual control across many sessions (see Supplementary Movie 1), where time-to-acquisition  
244 (TTA) for bimanual trials was only slightly longer than the TTA for unimanual trials on average (Fig. 4a).  
245 Amongst unimanual trials, the average TTA for right- and left-hand trials was similar. The average angular  
246 errors for both hands were generally higher during bimanual movement than during unimanual movement.

247  
248 During online control, T5 remarked that sequentially moving the cursors during the bimanual context instead  
249 of moving them simultaneously was a more intuitive strategy to employ. To investigate this further, we  
250 trained two separate RNNs where one was recalibrated normally as mentioned above, and the other was  
251 recalibrated with just unimanual data. On average, the sequential unimanual strategy outperformed the  
252 simultaneous bimanual strategy (Fig. 4b, Supplementary Movie 2). Interestingly, the sequential strategy  
253 often led to equal performance between unimanual right and unimanual left trials, indicating that the RNN  
254 better learned to disentangle the hands when recalibrated on just unimanual movements.

255  
256 Lastly, we compared linear decoders (LDs) to RNNs for simultaneous two-cursor control. Optimizing linear  
257 decoders during online evaluation is difficult since it often requires hand tuning of parameters such as output  
258 gain. For the fairest comparison against RNNs, we tested a range of output gain scalars for both LDs and  
259 RNNs. However, sweeping the gains did not affect the result of RNNs outperforming the LDs on average

### Recurrent neural network training and decoding

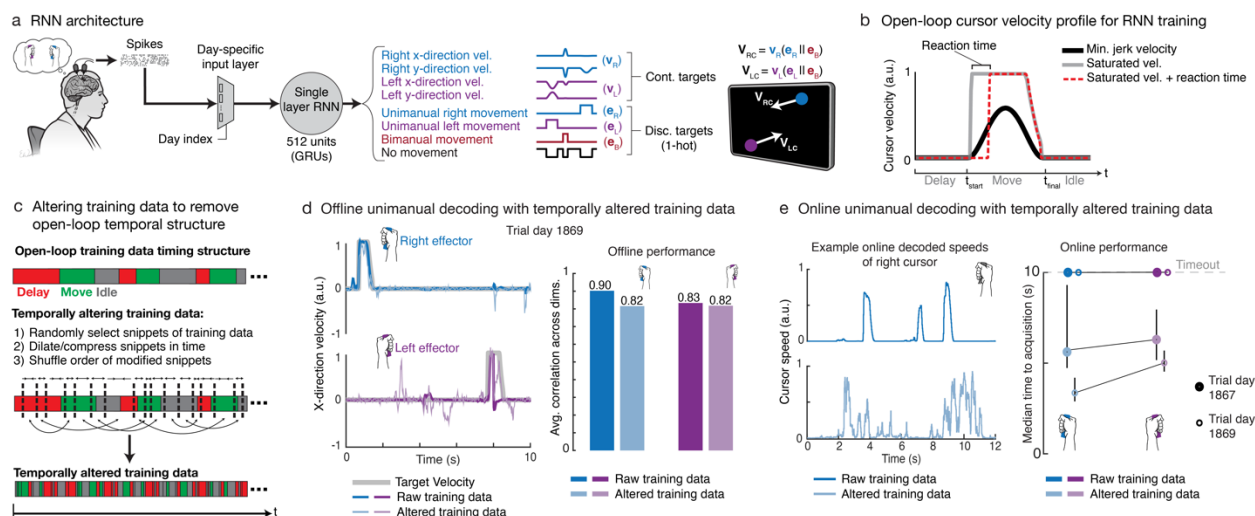

**Fig. 3 | Fracturing temporal structure in offline training data helps RNN decoders generalize to the online setting.** **a** Diagram of the decoding pipeline. First, neural activity (multiunit threshold crossings) was binned on each electrode (20-ms bins). Then, a trainable day-specific linear input layer transformed the binned activity from a specific day into a common space to account for day-to-day variabilities in signal recordings. Next, an RNN converted the day-transformed time series activity into continuous left and right cursor velocities ( $v_R, v_L$ ), and discrete movement context signals ( $e_R, e_L, e_B$ ). The movement context signals were then used to gate the appropriate cursor velocity outputs. **b** Example open-loop minimum-jerk cursor velocity (black) and modified saturated velocities (gray/red). Saturated velocity with a prescribed reaction time of 200 ms (red) is used for RNN training since it better approximates behavior. **c** Data alteration technique that introduces variability in the temporal and behavioral structure of training data. Data is subdivided into small snippets of variable length, each snippet is then dilated or compressed in time, and the order of the modified snippets are shuffled. This allows for synthetic data generation as well. **d** Offline decoding performance of RNNs trained with and without data alteration. Sample snippets of x-direction decoded velocities are shown for both cursors during unimanual movement with RNNs trained with and without alteration. Corresponding decoding performance (Pearson correlation coefficient) is summarized via bar plots. Offline performance is better without data alteration, mainly due to overfitting. **e** Decoders trained with unaltered data generated pulse-like movements online, as shown in the sample decoded cursor speeds for the right hand (top panel), whereas the RNN trained with altered data (bottom panel) allowed for quicker online corrections. Decoders trained with altered data acquired targets more quickly online.

(Fig. 4c, Supplementary Movie 3). In fact, the LDs resulted in mostly failed trials due to their inability to isolate control to one cursor (i.e., intended movements of one cursor would inadvertently move the other such that target acquisition was near impossible). As a control, T5 was able to acquire unimanual targets when the non-active cursor was fixed using LDs, indicating that failures during bimanual control were due to the LD's inability to separate left from right hand control.

### Neural networks leverage laterality information for improved unimanual decoding

Earlier, we found a large neural dimension coding for laterality, which we hypothesized would help identify which hand is moving at any given time – particularly useful if the tuning of the two hands is correlated during unimanual movement. Given that the RNNs outperformed linear decoders during unimanual movement, we sought to dissect the role of laterality information during decoding. First, we compared a simple linear decoder (LD; built via ridge regression) to a simple densely connected feed forward neural network (FFN) to assess each decoder's ability to use laterality information for unimanual movement decoding. These basic decoders were chosen to mitigate temporal filtering factors (i.e., use of time history as seen with Wiener filters and recurrent networks). That is, which decoder better predicts movement encoded in a single time-bin of neural activity? Using data from unimanual trials, both decoders were trained to convert firing rate input features at a single time-bin (20ms bin) to x- and y-direction velocities for both cursors. Figure 5a shows an example snippet of offline decoded x-direction velocities for unimanual movement of both hands. The FFN outperformed the LD in predicting velocity magnitudes for the left hand,

a Online performance of simultaneous bimanual control via RNN decoding

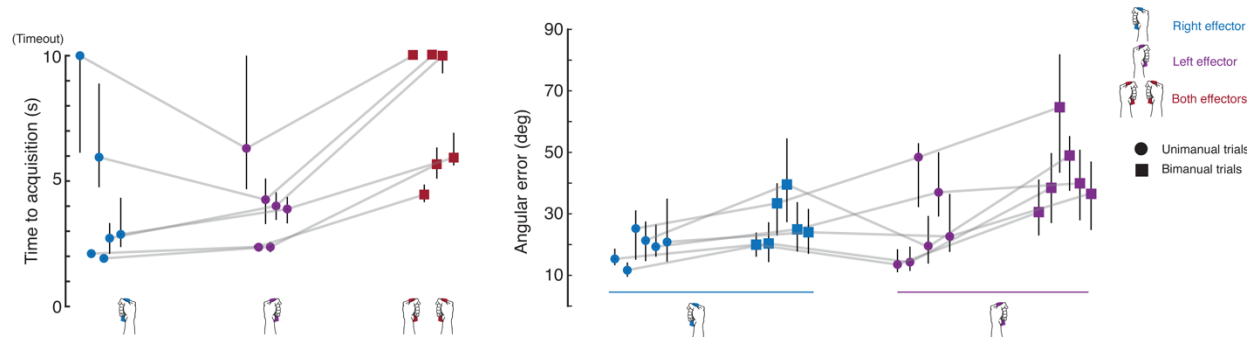

b Sequential unimanual vs. simultaneous bimanual

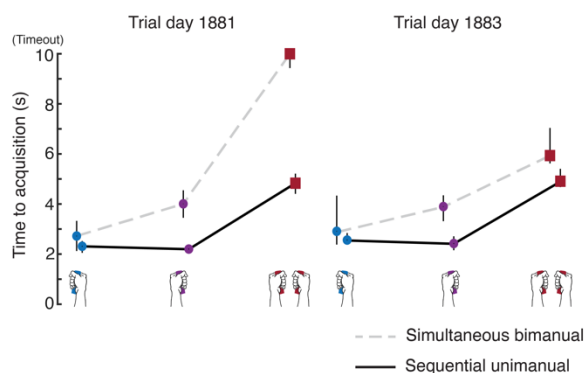

c Linear regression vs. RNN

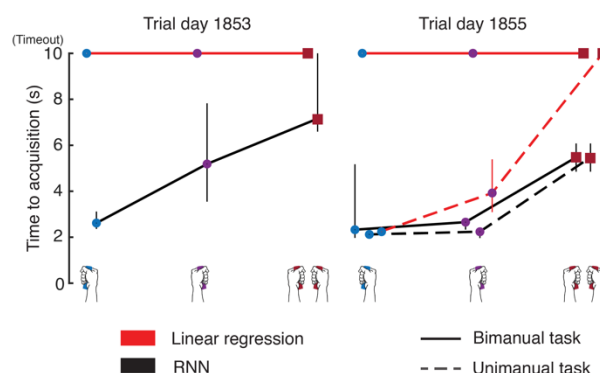

299  
300  
301  
302  
303  
304  
305  
306  
307  
308  
309  
310  
311  
312  
313

**Fig. 4 | RNN decoders enable two-cursor control and outperform linear decoders.** **a** Median target acquisition time and angular errors are shown for 6 days of simultaneous bimanual two-cursor control as enabled by RNN decoders. Light gray lines connect data points corresponding to the same session day. Each trial had a 10 s timeout after which the trial was considered failed. Angular error was calculated within an initial movement window (300-500 ms after go cue). All black bars are 95% CIs. Performance was generally good across most days, where decoders failed for only a few days. **b** A sequential unimanual control strategy (moving a cursor at a time; solid black line) was compared to simultaneous bimanual control (dashed gray line) over 2 sessions, of which the median target acquisition times are shown. The sequential unimanual control strategy led to faster target acquisitions. **c** RNN decoders were compared to linear decoders on 2 session days. Each point is the median target acquisition time for the corresponding trial type. Solid lines connect points corresponding to the normal bimanual task (consisting of simultaneous dual movements and unimanual single movements). A variation of the task where only unimanual movements were tested (holding the non-active cursor fixed) was used as a control on trial day 1855 to confirm that linear decoders could succeed in a purely unimanual context (dashed lines).

314 which is consistent with prior results<sup>50</sup> indicating that ipsilateral representation is generally weaker than  
315 contralateral representation (left hand is 48% weaker; see Supplementary Fig. 1d). Figure 5b summarizes  
316 offline unimanual decoding performance where the FFN outperformed the LD across all movement  
317 dimensions, with the greatest performance boost for unimanual left hand decoding.

318  
319 To further understand the extent to which the decoders used laterality information, we fit and subsequently  
320 removed the laterality dimension from neural data (see Methods). Removal of the laterality dimension did  
321 not affect decoding performance of the LD whatsoever; however, it did result in a performance hit across  
322 all movement dimensions for the FFN (Fig. 5b). Generally, the FFN's decoding performance was reduced  
323 to similar levels to that of the LD's performance, although the FFN's left hand decoding was still better than  
324 the LD (and its decoded outputs were larger in magnitude; see Supplementary Fig. 3a for distributions of  
325 decoded output magnitudes). Additionally, the FFN was better able to isolate movement decoding to the  
326 actively moving hand, which we quantified with cursor 'stillness' in Figure 5c. On average, the FFN  
327 outperformed the LD in keeping the left cursor still during right cursor movement, and vice versa. Removal  
328 of the laterality dimension led to a reduction in cursor stillness for the FFN. The LD was unable to keep the  
329



## Unimanual movement decoding

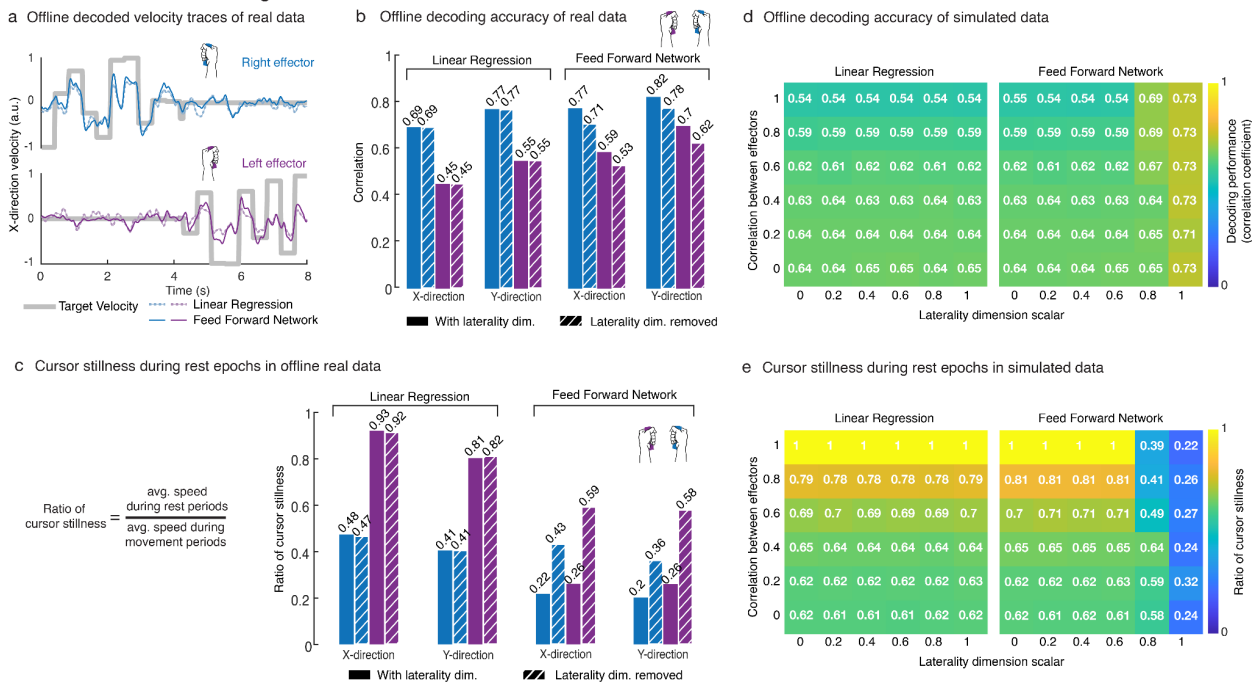

**Fig. 5 | Nonlinear decoders leverage laterality information to disentangle effectors.** **a** Offline single-bin decoding on unimanual data. Neural activity was binned (20-ms bins) and truncated to 400 ms movement windows (300-700 ms after go cue). Linear ridge regression (RR) and a densely connected feed forward neural network (FNN; single layer, 512 units) were trained, using 5-fold cross-validation, to decode left and right cursor velocities. Sample 8 s held-out snippets of decoded x-direction velocity traces are shown. **b** Each bar indicates the offline decoding performance (Pearson correlation coefficient) for the RR and FNN decoders across the x- and y-direction velocity dimensions. Striped bars indicate data where the laterality dimension was removed. The FNN outperformed the LD in decoding movements across all dimensions. Removal of the laterality dimension did not affect LD performance and only slightly reduced FNN performance. **c** Cursor stillness is quantified as the ratio of average cursor speed during rest periods to that during movement periods. A rest period is defined as the period in which the other cursor should be active. Lower ratios indicate more cursor stillness while the other cursor is active. The FNN was able to keep each cursor reasonably still, whereas the LD struggled to keep the left cursor still. The laterality dimension was useful to the FNN in keeping the cursors still, however, did not affect the LD. **d** Simulated neural activity during unimanual movement was generated with varying directional tuning correlation between hands and varying laterality dimension size. Each  $(i, j)$  cell of a matrix indicates the decoding performance (Pearson correlation coefficient) for a synthetic dataset with correlation  $i$  between hands and a laterality dimension size of  $j$ . **e** Cursor stillness for the simulated data in panel d is shown. The FNN leveraged the laterality dimension for improved decoding performance and cursor stillness as tuning between the hands became more correlated. The LD was unable to use the laterality information to disentangle the hands.

left cursor still while the right was active and removal of the laterality dimension did not alter the LD's ability to keep the cursors still.

To gain deeper insight into the role of laterality information in decoding unimanual movement, we simulated unimanual neural activity with Gaussian noise (see Methods and equations 3,4) where we varied the directional tuning correlation between the hands and varied the size of the laterality dimension. Figure 5d shows decoding performance of LDs and FFNs across the simulated data. As expected, LD performance degraded as the hands became more correlated regardless of the scale of the laterality dimension. Conversely, when the size of the laterality dimension was sufficiently large, the FFNs were able to achieve high decoding performance irrespective of how correlated the hands became. Additionally, we saw that the LDs were unable to use laterality information in keeping the non-active cursor still and cursor stillness degraded as the hands became increasingly correlated (Fig. 5e). The FFNs used laterality information, when it was salient enough, to disentangle the cursors which resulted in increased cursor stillness regardless of how correlated the hands became.

364  
365  
366  
367  
368  
369  
370  
371  
372  
373  
374  
375  
376  
377  
378  
379  
380  
381  
382  
383  
384  
385  
386  
387  
388  
389  
390  
391  
392  
393  
394  
395  
396  
397  
398  
399  
400  
401  
402  
403  
404  
405  
406  
407  
408  
409  
410  
411  
412  
413  
414  
415  
416

## Discussion

Deep learning algorithms are being increasingly used to improve the performance of real-time BCIs<sup>28,32,36,37,59,60</sup>. Prior work investigating deep learning methods for BCIs has reported promising offline results<sup>33,54–56,61–64</sup>, although most remain to be evaluated in an online setting due, in part, to the rarity of human BCI data. Here, we tested a deep learning method for real-time BCI control by a person with paralysis. We confronted a challenging nonlinear BCI problem – the simultaneous bimanual control of two cursors – using an RNN, which should be able to exploit the nonlinear structure in the neural data better than linear methods which have been previously used<sup>28,29,33,36</sup>. Consistent with prior work<sup>33,54–56</sup>, the RNN performed exceedingly well on offline data. However, we found that the high offline performance was due to the RNN overfitting to the temporal structure of the offline data. This, in turn, translated to poor online performance. In response, we altered the temporal structure of the training data which helped the RNN generalize to the online setting, enabling it to far outperform linear methods. Thus, preventing neural networks from overfitting to stereotyped structure in training data may be necessary for translating deep learning methods to real-time BCI control and obtaining the associated performance benefits.

The data alteration method proposed here is one way to approach the problem of neural network overfitting to offline BCI training data, which was accomplished by dilating/compressing smaller snippets of training data and shuffling the order of the modified snippets. There are likely many other methods of helping neural networks generalize to data with less stereotyped structure. For example, there has been a recent compelling approach in NHPs<sup>37</sup> which recalibrates neural networks by using movement intention estimation techniques motivated by the ReFIT (recalibrated feedback intention-trained) algorithm<sup>39</sup>. In this same study, Willsey et al. deployed a shallow feed-forward network for online BCI control where only 150 ms windows of data were used at each time step. Similar to these short windows of data, we suspect that our data alteration method forced the RNN to learn smaller time histories of data, allowing it to learn the temporal characteristics of bimanual movement-related neural activity without overlearning the specific sequence of behaviors performed during open-loop trials.

An additional useful feature of this method is that it generates synthetic data which helps prevent overfitting to the limited amount of data that is normally collected in human BCI research. Typically, BCI decoder calibration tasks are on the order of minutes and generally do not generate more than a few hundred trials worth of data<sup>12,13,20–22,38,50,65</sup>, whereas this method can easily increase this training data quantity by orders of magnitude, which may prevent overfitting (as shown in recent work on handwriting decoding<sup>28</sup>). Future studies could investigate the utility of altering temporal structure in training data across different network architectures and decoding algorithms. Snippet window widths and the quantity of synthetic data are additional hyperparameters that could be further optimized in future work.

In addressing the challenge of decoding bimanual hand movements from neural activity, neural networks were better able to use the nonlinear structure in the neural data compared to linear methods. Laterality information (neural coding for the side of the body) was instrumental in helping the networks distinguish between left and right hand unimanual movements, particularly as neural tuning between the hands became increasingly correlated<sup>50,66,67</sup>. Linear decoders cannot leverage laterality information since it is independent of movement direction, resulting here in inadvertent decoded movements of the other effector during unimanual movement.

In this study, we demonstrated bimanual two-cursor control, consistent with a trend towards decoding more challenging behaviors for BCI systems including fine dextrous hand control<sup>37,42</sup> and the control of multiple effectors<sup>41,50,52</sup>. Deep learning methods will likely be increasingly useful for decoding these complex movements with potentially nonlinear neural representations (as highlighted here for bimanual movements). A key consideration in implementing RNN-based decoders will be to reduce overfitting to stereotyped structure in training data. In sum, altering the temporal and behavioral structure within training data can help translate deep learning methods to real-time BCI control – a potentially necessary step in helping these systems achieve clinical translation.

417

## 418 **Methods**

### 419 **Study permissions and participant details**

420 This work includes data from a single human participant (identified as T5) who gave informed consent and  
421 was enrolled in the BrainGate2 Neural Interface System clinical trial (ClinicalTrials.gov Identifier:  
422 NCT00912041, registered June 3, 2009). This pilot clinical trial was approved under an Investigational  
423 Device Exemption (IDE) by the US Food and Drug Administrations (Investigational Device Exemption  
424 #G090003). Permission was also granted by the Stanford University Institutional Review Board (protocol  
425 #20804) and the Mass General Brigham IRB (protocol #2009P000505).

426

427 Participant T5 is a right-handed male (69 years of age at the time of study) with tetraplegia due to cervical  
428 spinal cord injury (classified as C4 AIS-C) which occurred approximately 9 years prior to enrollment in the  
429 clinical trial. In August 2016, participant T5 had two 96-channel intracortical microelectrode arrays  
430 (Blackrock Microsystems, Salt Lake City, UT; 1.5 mm electrode length) placed in the hand knob area of the  
431 left (dominant) precentral gyrus. The hand knob area was identified by pre-operative magnetic resonance  
432 imaging (MRI). Supplementary Figure 1a shows array placement locations registered to MRI-derived brain  
433 anatomy. T5 has full movement of the face and head and the ability to shrug his shoulders. Below the level  
434 of spinal cord injury, T5 has very limited voluntary motion of the arms and legs. Any intentional movement  
435 of the body below the level of injury is referred to as being “attempted” movement where small amplitude  
436 movements were intermittently observed.

437

### 438 **Neural data processing**

439 Neural signals were recorded from two 96-channel Utah microelectrode arrays using the NeuroPort™  
440 system from Blackrock Microsystems (see [12] for basic setup). First, neural signals were analog filtered  
441 from 0.3 to 7.5 kHz and subsequently digitized at 30kHz with 250 nV resolution. Next, common mode noise  
442 reduction was accomplished via a common average reference filter which subtracted the average signal  
443 across the array from every electrode. Finally, a digital high-pass filter at 250 Hz was applied to each  
444 electrode prior to spike detection.

445

446 Spike threshold crossing detection was implemented using a  $-3.5 \times$  RMS threshold applied to each  
447 electrode, where RMS is the electrode-specific root mean square of the time series voltage recorded on  
448 that electrode. Consistent with other recent work, all analyses and decoding were performed on multiunit  
449 spiking activity without spike sorting for single neuron activity<sup>68–70</sup>.

450

### 451 **Session structure and two-cursor tasks**

452 Neural data was recorded from participant T5 in 3-5 hour “sessions”, with breaks, on scheduled days (see  
453 Supplementary Table 2 for a comprehensive list of data collection sessions). T5 either sat upright in a  
454 wheelchair that supported his back and legs or laid down on a bed with his upper body inclined and head  
455 resting on a pillow. A computer monitor was placed in front of T5 which displayed two large circles indicating  
456 targets (one colored purple and one colored white) and two smaller circles indicating cursors with  
457 corresponding colors. The left cursor was labeled ‘L’ and colored purple and the right cursor was labeled  
458 ‘R’ and colored white.

459

460 During the open-loop task, the cursors moved autonomously to their designated targets in a delayed-  
461 movement paradigm. On each trial, one of three movement types were cued randomly: (1) bimanual  
462 (simultaneous movement of both cursors), (2) unimanual right (only right cursor movement), and (3)  
463 unimanual left (only left cursor movement). Each trial began with a random delay period ranging from 1-2  
464 seconds where lines appeared and connected each cursor to its intended target. During the delay period,  
465 T5 would prepare the movement. After the delay period, indicated by a beep sound denoting the ‘go’ cue,  
466 the lines disappeared and the cursors moved to their targets over a period ranging 1-2 seconds in length,  
467 where cursor movement was governed by a minimum-jerk trajectory<sup>50,71</sup> (black velocity profile in Fig. 3b).  
468 Both cursors arrived at their intended target at the same time. T5’s attempted movement strategy was to  
469 imagine that his hands were gripping joysticks (as illustrated in Fig. 1a) and to push on each joystick to

470 control the corresponding cursor's motion. The end of each trial was indicated by another beep sound  
 471 where T5 was instructed to stop all attempted movements and to begin preparing for the next trial's  
 472 movement.

473  
 474 The closed-loop tasks generally mimicked the open-loop task except that the cursors were controlled via  
 475 neural decoders (either an RNN or linear decoder) instead of having prescribed motion to their targets.  
 476 During each closed-loop trial, T5 had a maximum of 10 seconds to acquire both targets. Target acquisition  
 477 was defined as both cursors simultaneously dwelling within their intended target for an uninterrupted  
 478 duration of 500 ms. If any one cursor moved outside of its target before the dwell period elapsed then the  
 479 dwell timer was restarted. Both targets were illuminated blue during a proper simultaneous dwell (see  
 480 Supplementary Movie 1). If the targets were not successfully acquired within the 10 second timeout period  
 481 then the trial was considered failed.

482  
 483 An "assisted" version of the closed-loop task was often used for decoder recalibration prior to true closed-  
 484 loop evaluation blocks. Assistance was provided in the form of "error assistance" and/or "push assistance".  
 485 Error assistance<sup>11,72</sup> was accomplished by attenuating velocity commands in the dimensions orthogonal to  
 486 each cursor's straight-line path to the respective target. The attenuation factor was determined by a scalar  
 487 value ranging from 0-1 where 0 provided no error assistance and 1 would remove all orthogonal velocity  
 488 commands resulting in cursor movement along the line to the target. Push assistance was given for each  
 489 cursor via adding a unit velocity vector in the direction of the corresponding target (referred to as "push  
 490 vector") which was scaled by the decoded cursor speed (magnitude of the velocity vector). The degree of  
 491 push assistance was also governed by a scalar value ranging from 0-1 where 0 provided no push assistance  
 492 and 1 would scale the push vector to the size of the decoded cursor velocity vector. The point of push  
 493 assistance was to reinforce movement to the intended target by only aiding when the participant was trying  
 494 to move. The amount of push and error assistance on each block was governed by the experimenter to  
 495 ensure that the participant was able to acquire most, if not all, targets for recalibration purposes.

496  
 497 Since performance during recalibration was generally suboptimal, unimanual trials would often result in  
 498 movement of both cursors which then would require bimanual control to correct cursor deviation. This was  
 499 not ideal when considering the balance of training data for trial and movement type. To address this, we  
 500 instituted a "lock mode" where the non-active cursor's motion was fixed so that the participant was able to  
 501 focus on the cursor which was cued to move during unimanual trials.

502  
 503 **Offline population-level analyses**

504 *Cross-validated estimates of neural tuning strength and tuning correlation between effectors*  
 505 We used cross-validated estimates of Euclidean distance for the quantification of neural tuning strength  
 506 and other statistics requiring Euclidean distance, such as Pearson's correlation between groups of linear  
 507 model tuning coefficients. These methods are discussed in greater detail in our prior report<sup>50</sup> (Willett\*, Deo\*,  
 508 et al. 2020; see code repository <https://github.com/fwillett/cvVectorStats>).

509  
 510 Tuning strength was quantified using a cross-validated implementation of ordinary least squares regression  
 511 (cvOLS.m) to estimate the magnitude of columns of linear model coefficients. Tuning coefficients were  
 512 found using the following model:

513  
 514 
$$f = \mathbf{E} \begin{bmatrix} 1 \\ d_{rx} \\ d_{ry} \\ d_{lx} \\ d_{ly} \end{bmatrix}, \quad \begin{bmatrix} 1 \\ d_{rx} \\ d_{ry} \\ d_{lx} \\ d_{ly} \end{bmatrix} = \begin{bmatrix} 1 & & & & \\ p_{rx}^{target} & - & p_{rx}^{cursor} & & \\ p_{ry}^{target} & - & p_{ry}^{cursor} & & \\ p_{lx}^{target} & - & p_{lx}^{cursor} & & \\ p_{ly}^{target} & - & p_{ly}^{cursor} & & \end{bmatrix}, \quad \mathbf{E} = \begin{bmatrix} b_0^1 & b_{rx}^1 & b_{ry}^1 & b_{lx}^1 & b_{ly}^1 \\ b_0^2 & b_{rx}^2 & b_{ry}^2 & b_{lx}^2 & b_{ly}^2 \\ \vdots & \vdots & \vdots & \vdots & \vdots \\ b_0^N & b_{rx}^N & b_{ry}^N & b_{lx}^N & b_{ly}^N \end{bmatrix} \quad (2)$$

521 Here,  $f$  is the  $N \times 1$  firing rate vector for a single time step where  $N$  is the number of electrode channels.  $E$   
 522 is an  $N \times 5$  matrix of mean firing rates (first column; superscript denotes electrode number) and directional



523 tuning coefficients (second to fifth columns; superscript is electrode number and subscript represents the  
524 hand as  $r$  or  $l$  and movement as the  $x$ - or  $y$ -direction). Variables  $d_{rx}$ ,  $d_{ry}$ ,  $d_{lx}$ , and  $d_{ly}$  of the predictor vector  
525 represent the  $x$  and  $y$  components of the right ( $r$ ) and left ( $l$ ) hand's intended movement defined as the  
526 corresponding difference between target position ( $p$  terms with superscript '*target*') and cursor position ( $p$   
527 terms with superscript '*cursor*').  $E$  was fit via 5-fold cross-validated ordinary least-squares regression using  
528 20-ms binned data within a window from 300 to 700 ms after the go cue across all trials. This was  
529 accomplished by "stacking" the response (firing rate) and predictor vectors horizontally across all candidate  
530 timesteps. Block-wise means were calculated and subtracted from all neural data prior to analyses to adjust  
531 for nonstationarities and neural drift over time<sup>73,74</sup>.

532  
533 The data used in Figure 2 were from 5 session days (trial days 1776, 1778, 1792, 1881 and 1883) where  
534 we were able to collect large amounts of unimanual and bimanual open-loop data (since cross-validation  
535 requires each fold to have enough data to properly estimate regression coefficients). For each session day,  
536 we grouped consecutive blocks together in pairs to reach around 40 repetitions, at least, per trial type  
537 (unimanual right, unimanual left, and bimanual). Within each block set, we used the cvOLS function to  
538 compute the coefficient vectors and their magnitudes for each movement type. That is, we fit a separate  
539 model to all unimanual right trials, all unimanual left trials, and all bimanual trials. Notice that fitting the  
540 unimanual models reduces the encoding matrix  $E$  to three columns (e.g., the last two columns related to  
541 the left hand are removed when fitting for unimanual right movement). We defined tuning strength for each  
542 hand (right or left) under the unimanual or bimanual contexts by averaging over the corresponding model's  
543  $x$ - and  $y$ -direction coefficient vector magnitudes. Ratios of these tuning strengths between models across  
544 each pair of block sets are reported in Figure 2b (gray dots; sample size of 25). Tuning correlation in Figure  
545 2c was quantified by computing the (cross-validated) Pearson correlation between corresponding  $x$  or  $y$ -  
546 direction coefficient vectors between models (gray dots indicate correlations between models, as listed on  
547 the  $x$ -axis, across all block-sets). Correlations were computed using the cvOLS function. The  $x$ - and  $y$ -  
548 direction correlations are shown separately since the hands are more correlated in the  $y$ -direction and anti-  
549 correlated in the  $x$ -direction, as we have previously shown<sup>50</sup>, which would result in nullifying effects if  
550 correlations were averaged across direction dimensions.

#### 551 *Principal component analysis (PCA) of laterality coding*

552 We used PCA to visualize the neural activity in a lower-dimensional space as illustrated in Figure 2d. Using  
553 data from one of the sessions (trial day 1881) described above (20-ms binned, block-wise mean removed,  
554 Z-scored), we computed each trial's average firing rate vector within the 300-700 ms window after the go  
555 cue. We then stacked each trial's  $N \times 1$  firing rate vector horizontally resulting in an  $N \times T$  matrix where  $T$  is  
556 the number of trials. PCA was performed on this monolithic matrix and each firing rate vector was  
557 subsequently projected onto the top two principal components (PCs) as illustrated in the left panel of Figure  
558 2d. The single-trial projections were colored by the trial type (unimanual right trial, unimanual left trial, or  
559 bimanual trial) to show how the data clustered. Next, we projected each trial's binned firing rates across  
560 time (-500 ms to 1.5 s relative to the go cue) onto the top PC to visualize a population-level peristimulus  
561 time histogram. Each thin line corresponds to a single trial's projection, colored by trial type, and the bold  
562 lines are the mean projections shaded with 95% confidence intervals computed via bootstrap resampling.

563  
564  
565 In order to quantify the size of laterality-related tuning, we used a variation of demixed principal component  
566 analysis<sup>57</sup> (dPCA; Kobak et al., 2016; <https://github.com/machenslab/dPCA>). A central concept of dPCA is  
567 marginalizing the neural data across different sets of experimentally manipulated variables, or factors. Each  
568 marginalization is constructed by averaging across all variables that are not in the marginalized set,  
569 resulting in a data tensor that captures the effect of the factors on the neural activity. dPCA then finds neural  
570 dimensions that explain variance in each marginalization alone, resulting in a useful interpretation of neural  
571 activity according to the factors. Leveraging the existing dPCA library, we implemented a cross-validated  
572 variance computation to reduce bias by splitting the data into two sets, marginalizing each set, element-  
573 wise multiplying the marginalized matrices together, and summing across all entries. The data was  
574 marginalized over the following four factors: laterality, movement direction, laterality  $\times$  movement direction  
575 interaction, and time. For each dataset used in Figure 2b,c (trial days 1776, 1778, 1792, 1881 and 1883),

576 we computed the cross-validated variance in the aforementioned factors. The bar plots in Figure 2d  
577 (rightmost panel) summarize the average cross-validated marginalized variance for each factor (labeled  
578 along the x-axis) across all 5 sessions (gray dots).

579

### 580 **Single electrode channel tuning**

581 To assess neural tuning to unimanual or bimanual movement on a given electrode as seen in  
582 Supplementary Fig. 1, we used a 1-way ANOVA on firing rates observed during directional hand  
583 movements within each movement context. This analysis was performed on the same dataset used in  
584 Figure 1 (trial day 1750). We first computed the average firing rate vector for each trial within the 300 to  
585 700 ms window relative to the go cue. Next, we separated each of the computed average firing rate vectors  
586 into the following sets: unimanual right trials, unimanual left trials, and bimanual trials. Within each set, we  
587 grouped the vectors into their respective movement direction (4 directions defined by each quadrant in the  
588 unit circle) for each hand. Grouping the bimanual trials for right hand movement direction ignored left hand  
589 movement direction and vice versa. This resulted in 4 total sets of firing rate vectors grouped by their  
590 respective hand's movement direction (unimanual right directions, unimanual left directions, bimanual right  
591 directions, and bimanual left directions) and a separate 1-way ANOVA was performed within each set. If  
592 the p-value was less than 0.00001, the electrode was considered to be strongly tuned to that movement  
593 context (unimanual or bimanual). To assess the tuning strength of each strongly tuned electrode, we  
594 computed FVAF (fraction of variance accounted for) scores<sup>50,65</sup>. The FVAF score was computed using the  
595 following equations:

596

597

$$598 \quad FVAF = \frac{SS_{dir}}{SS_{total}}$$

599

600

$$601 \quad SS_{total} = \sum_{i=1}^N (f_i - \tilde{f})^2$$

602

603

$$604 \quad SS_{dir} = \sum_{i=1}^N (\tilde{f}_{D[i]} - \tilde{f})^2$$

605

606

607

608 Here,  $SS_{total}$  is the total variance (sum of squares),  $SS_{dir}$  is the movement direction-related variance,  $N$  is  
609 the total number of trials,  $f_i$  is the average firing rate vector for trial  $i$ ,  $\tilde{f}$  is the average firing rate vector  
610 across all trials within the set, and  $\tilde{f}_{D[i]}$  is the average firing rate vector for the particular movement direction  
611 cued on trial  $i$ . FVAF scores range from 0 (no direction-related variance) to 1 (all variance is direction-  
612 related).

613

### 614 **Training data augmentation via dilation and randomization of training snippets**

615 The raw data as formatted for RNN training took the form of an input 'feature' data tensor of shape  $S \times T \times N$   
616 and an output 'target' tensor of shape  $S \times T \times R$ . Here,  $S$  is the number of training snippets,  $T$  is the  
617 number of time points in a snippet,  $N$  is the number of electrode channels, and  $R$  is the number of response  
618 or output variables. The input tensor consisted of neural data which was binned at 20 ms, block-wise mean  
619 removed, and Z-scored. The output tensor contained the cursors' velocities and movement context signals  
620 which were also binned at 20 ms (see Fig. 3 and Supplementary Fig. 2). Typically, we held our training  
621 snippet length at 10 s ( $T=500$  at 20-ms bins). We generated a large number of synthetic training snippets  
622 by splicing together smaller pieces of the data stream which were also dilated in time and random in order.

623

624 Our objective was to generate an augmented dataset which was balanced across movement direction and  
625 movement type. We defined 4 gross movement directions corresponding to each quadrant of the unit circle  
626 and movement type was defined as unimanual, bimanual, or no-movement. The types of no-movement  
627 were further subdivided into the following groups: (1) unimanual right delay period, (2) unimanual left delay  
628 period, (3) bimanual delay period, and (3) rest. This distinction in types of no-movement was so that we

629 may equally account and balance for preparatory activity as well as rest activity. The training data was  
630 preprocessed to label each data sample's movement quadrant per hand and movement type. We generated  
631 roughly 2000 synthetic training snippets (each snippet of 10 s length) for training, which was chosen based  
632 on the time it took to perform the augmentation during an average experiment session (10-15 minutes). A  
633 synthetic 10 s training snippet was generated by appending dilated/compressed clips of raw data. Each  
634 raw data clip was selected to begin at a random time point, varied in duration (ranging between 0.2 to 0.8  
635 times the 10s total snippet length), and had an associated dilation/compression factor  $d_f$  drawn from a  
636 uniform distribution over the interval [0.5, 2], where  $d_f = 1$  indicates no change,  $d_f < 1$  indicates  
637 compression, and  $d_f > 1$  indicates dilation. For a candidate clip to be considered valid, it had to abide by  
638 the current balancing record which was kept across all of the aforementioned movement conditions.  
639 Generally, the input data was balanced to achieve a sufficient amount of data for each of the movement  
640 types. If the candidate clip did not meet the balancing requirements, then another random clip was drawn.  
641 Linear interpolation was used to either compress or stretch both the input and output clips of raw data based  
642 on the dilation/compression factor (e.g., a  $d_f$  of 0.5 would compress a clip array of length 60 into an array  
643 of length 30 by sampling every other element of the original clip). The data augmentation method generated  
644 both a training and held-out validation set that did not contain overlapping data. The input data was split  
645 into a training and validation set in advance, then from these isolated pools augmented sets of training data  
646 could be created.

#### 647 648 **Online recurrent neural network decoding of two-cursors**

649 We used a single-layer gated recurrent unit (GRU) recurrent neural network architecture to convert  
650 sequences of threshold crossing neural firing rate vectors (which were binned at 20 ms and Z-scored) into  
651 sequences of continuous cursor velocities and discrete movement context signals. The discrete context  
652 signals coded for which movement (unimanual right, unimanual left, bimanual, or no movement) occurred  
653 at that moment in time and enabled the corresponding cursor velocity commands to be gated. We used a  
654 day-specific affine transform to account for inter-day changes in neural tuning when training data were  
655 combined across multiple days. The RNN model and training was implemented in *TensorFlow v1*. The  
656 online RNN decoder was deployed on our real-time system by extracting the network weights and  
657 implementing the inference step in custom software. The RNN inference step was 20 ms. A diagram of the  
658 RNN is given in Supplementary Fig. 2.

659  
660 Before the first day of real-time evaluation, we collected pilot offline data across 2 session days (trial days  
661 1752 and 1771) comprising 1 hour of 780 total trials (balanced for unimanual and bimanual trials) which  
662 were combined to train the RNN. All training data were augmented to generate around 2000 training  
663 snippets of ten second length amounting to roughly 6 hours of data (balancing equally for each movement  
664 type). We tuned the initial RNN model's hyperparameters (input noise, input mean drift, learning rate, batch  
665 size, number of training batches, and L2-norm weight regularization) via a random search deployed across  
666 100 RNNs. On each subsequent day of real-time testing, additional open-loop training data were collected  
667 (approximately 25 minutes of 280 trials; roughly 6 hours of 30K trials after augmentation) to recalibrate the  
668 RNN which was subsequently used to collect 4 assisted closed-loop blocks (5 minutes each) for a final  
669 recalibration. For each RNN recalibration, all data that were used for training up until that point in time were  
670 included, where 40% of training examples were from the most recently collected dataset and the remaining  
671 60% of training examples were evenly distributed over all other previously collected datasets. During  
672 recalibration periods in which the RNN was training, firing rate means and standard deviations were  
673 updated via an elongated open-loop block (8-minutes in length) which were used to Z-score the input firing  
674 rates prior to decoding. This RNN training protocol was used for the unimanual and simultaneous bimanual  
675 data presented in Figure 4a. In total, performance was evaluated across 6 days (trial days 1752, 1771,  
676 1776, 1778, 1790, 1792) with each day containing between 4-8 blocks (5 minutes each) with balanced trials  
677 across each movement context.

678  
679 The RNN training varied slightly for the 'sequential bimanual' data presented in Figure 4b. The base RNN  
680 (prior to the first day of real-time evaluation) was calibrated in the same fashion as mentioned above,

681 however each subsequent dataset used for recalibration consisted of just unimanual trials and no bimanual  
682 trials. Data from two evaluation sessions (trial days 1881 and 1883) were used for Figure 4b.  
683

684 The data augmentation panels of Figure 3d,e were generated based on data from two session days (trial  
685 days 1867 and 1869). The two separate RNNs used were trained only on the data gathered during those  
686 sessions and did not include any historical data to focus on the effects of our data augmentation technique.  
687 One RNN was trained with data that was augmented and the other RNN was trained on the raw non-  
688 augmented data. The open-loop results and sample speed traces shown in Figure 3d,e are from trial day  
689 1869.  
690

#### 691 *Online two-cursor control performance assessment*

692 Online performance was characterized by time-to-acquisition and angular error. Time-to-acquisition for a  
693 trial was defined as the amount of time after the go cue in which the targets were successfully acquired.  
694 Angular error was defined as the average difference between movement direction within the 300 to 500 ms  
695 window after the go cue to capture the ballistic portion of each movement prior to any error correction. Each  
696 trial timed out at 10 seconds, after which the trial was considered failed.  
697

#### 698 *Comparing linear regression and RNN decoding*

699 We tested a range of output gains for the comparison of online linear decoders and RNNs used for Figure  
700 4c (includes data from trial days 1853 and 1855) to ensure that performance differences were not due to  
701 variation in decoded output magnitudes. The range of gain values was determined on each session day by  
702 a closed-loop block (preceding data collection) where the experimenter hand-tuned values until the  
703 participant's control degraded. Hand-tuning of gain values was done for the linear decoder and RNN,  
704 separately. Each session day had 4-5 equally spaced gain values for each decoder. For the data presented  
705 in Figure 4c, we averaged over all swept gains to summarize performance for each decoder since it turned  
706 out that the result was not affected by what gain was used (e.g., linear decoder results include data from  
707 each swept gain).  
708

#### 709 **Offline single-bin decoding of real and simulated unimanual data**

##### 710 *Real and simulated neural data for unimanual movement*

711 The real unimanual dataset analyzed for Figure 5a,b,c was from trial day 1883. The data were binned (20-  
712 ms bins), block-wise mean removed, and each trial truncated to 400 ms movement windows (300 to 700  
713 ms after the go cue). In keeping with standard BCI decoding practice and to focus on directional movement  
714 decoding, we defined the velocity target for each time step as the unit vector pointing from the cursor to the  
715 target, resulting in discrete velocity steps as seen in Figure 5a (thick gray lines).  
716

717 When generating synthetic data for simulations, we attempted to match the 'functional' signal-to-noise ratio  
718 (fSNR) of the real dataset for a more practical comparison. The fSNR decomposes decoder output into a  
719 signal component (a vector pointing at the target) and a noise component (random trial-to-trial variability).  
720 We first generated the decoder output using a cross-validated linear filter to predict a point-at-target unit  
721 vector  $y_t$  (normalized target position minus cursor position) given neural activity as input.  
722

723 We then fit the following linear model to describe the decoder output:

$$724 \hat{y}_t = D y_t + \epsilon_t$$

725 Here,  $y_t$  is the 2 x 1 point-at-target vector,  $\hat{y}_t$  is the cursor's predicted velocity vector at timestep t,  $D$  is the  
726 2 x 2 decoder matrix, and  $\epsilon_t$  is the 2 x 1 vector of gaussian noise at timestep t.  
727

728 We computed the functional SNR ( $fSNR$ ) as:

$$729 fSNR = \frac{1}{2}(D_{1,1} + D_{2,2}) / \sigma$$

730 Here,  $D_{1,1}$  and  $D_{2,2}$  are the diagonal terms (subscripts refer to row i and column j) of the 2 x 2  $D$  matrix, and  
731  $\sigma$  is the standard deviation of  $\epsilon$  (averaged across both dimensions). We estimated  $D$  by least squares  
732 regression. We estimated  $\sigma$  by taking the sample standard deviation of the model error. Intuitively, the



733 numerator describes the size of the point-at-target component of the decoder output, and the denominator  
734 describes the size of the trial-to-trial variability.

735  
736 To simulate neural activity, we used the laterality encoding model in equation 4 where we varied the  
737 directional tuning correlation between the hands and the size of the laterality dimension (as labeled along  
738 the x- and y-axes of Fig. 5d,e). We began by generating a synthetic target dataset containing unimanual  
739 velocities for the left and right hands. The synthetic targets consisted of approximately 2000 unimanual  
740 right trials and 2000 unimanual left trials. Trial lengths were 400 ms in duration to match the real dataset  
741 and binned in 20-ms bins. The synthetic target data were balanced across 8 movement direction wedges  
742 evenly distributed throughout the unit circle (see x-axes in Fig. 1c for direction wedges). Specifically, a  
743 uniformly random unit velocity vector was generated within a direction wedge for each trial ensuring even  
744 distribution across all wedges for both hands. Essentially, the synthetic targets resembled the sample real-  
745 data targets seen in Figure 5a (thick gray lines). Next, we generated random tuning coefficients ( $b$  terms in  
746 eq. 4) for 192 synthetic neurons by sampling from a standard normal distribution. The population-level  
747 tuning vectors were then scaled to match the magnitudes of corresponding tuning vectors from the real  
748 dataset (using cvOLS). We then enforced a correlation (which was swept, see y-axes of Fig. 5d,e) between  
749 the x-direction tuning vectors for both hands as well as the y-direction vectors. Next, we passed the  
750 synthetic velocity targets through the tuning model to compute the population-level firing rates for each time  
751 bin. The fSNR for each hand was matched to the real data via adding gaussian noise to each individual  
752 channel (sweeping the standard deviation parameter) until the fSNRs of the synthetic data was close to  
753 that of real data. The simple noise model is described as follows:

754  
755  
756 
$$f_{n, \text{noisy}} = \text{Gauss}(f_n, \Sigma), \quad f_n \in \mathbb{R}^{T \times 1}, \quad \Sigma \in \mathbb{R}^{T \times T} \quad \Sigma = \begin{bmatrix} \sigma^2 & & 0 \\ & \ddots & \\ 0 & & \sigma^2 \end{bmatrix} \quad (3)$$
  
757  
758  
759

760 Here,  $f_n$  is a  $T \times 1$  time-series vector of firing rates for channel  $n$  where  $T$  represents the number of 20-ms  
761 time bins,  $\Sigma$  is the  $T \times T$  diagonal covariance matrix, and  $\sigma$  is the standard deviation. This was a simple  
762 noise model with a diagonal covariance matrix used for all channels (i.e., the same  $\sigma$  was used for all  
763 channels). We understand that more sophisticated noise models could have been used, but our simplified  
764 approach was well enough suited for single-bin decoding where one can assume independence between  
765 time bins which is further explained in Supplementary Figure 4. After matching the fSNRs, we scaled the  
766 laterality coefficient vector where a value of 0 removed the laterality dimension completely, and a value of  
767 1 matched the laterality coefficient magnitude of the real data. Finally, we enforced that no firing rates were  
768 below zero by clipping negative firing rates to 0.

769  
770 *Linear ridge regression and feed forward neural network for single-bin decoding*

771 The real data was split into 5-folds for cross-validation with balanced unimanual right and unimanual left  
772 time steps of data within each fold. Cross-validation was necessary for the real dataset since the number  
773 of trials was relatively small (482 total trials) in comparison to the simulated dataset (4000 total trials). The  
774 simulated datasets were large enough and balanced in terms of trial types that in addition to cross-validation  
775 during decoder training, performance was based on completely held out test sets (20% of total simulated  
776 data) which were also balanced for trial type.

777  
778 Simple linear ridge regression was performed on the real and simulated datasets using a neural decoding  
779 python package ([https://github.com/KordingLab/Neural\\_Decoding](https://github.com/KordingLab/Neural_Decoding)) and the Scikit-Learn library (RidgeCV  
780 function). The ridge parameter was swept until decoding performance (measured as the Pearson  
781 correlation coefficient) was maximized across all output dimensions. Each feed forward neural network  
782 (FFN) was designed as a single densely connected layer of 512 units (*TensorFlow v.1*). The FFNs were  
783 initialized with random weights and model parameters were tuned based on an offline hyperparameter  
784 sweep on pilot data. All decoders were trained to convert firing rate input features ( $N \times 1$  vector) at a single  
785 time-bin (20ms bin) to x- and y-direction velocities for both cursors ( $4 \times 1$  velocity vector at each time step).

786  
787  
788  
789  
790  
791  
792  
793  
794  
795  
796

### Removing laterality information from real unimanual data

Laterality information was removed from real unimanual data by first fitting the linear tuning model below using cross-validation:

$$f = E_{lat} \begin{bmatrix} 1 \\ d_{rx} \\ d_{ry} \\ d_{lx} \\ d_{ly} \\ c_{lat} \end{bmatrix}, \quad c_{lat} = \begin{cases} +1 & , \text{ if unimanual right} \\ -1 & , \text{ if unimanual left} \end{cases} \quad E_{lat} = \begin{bmatrix} b_0^1 & b_{rx}^1 & b_{ry}^1 & b_{lx}^1 & b_{ly}^1 & b_{lat}^1 \\ b_0^2 & b_{rx}^2 & b_{ry}^2 & b_{lx}^2 & b_{ly}^2 & b_{lat}^2 \\ \vdots & \vdots & \vdots & \vdots & \vdots & \vdots \\ b_0^N & b_{rx}^N & b_{ry}^N & b_{lx}^N & b_{ly}^N & b_{lat}^N \end{bmatrix} \quad (4)$$

797  
798  
799  
800  
801  
802  
803

Here, the model resembles that in equation 2 except with the addition of a laterality predictor variable ( $c_{lat}$ ) which is +1 for unimanual right movement or -1 for unimanual left. There is an additional column of coefficients ( $b_{lat}$  terms) in the encoding matrix  $E$ . After this model was fit, the neural activity was projected onto the laterality dimension (last column vector of  $E$ ) and the projected neural activity was subsequently subtracted from the original neural activity. To ensure that laterality information was sufficiently removed, we built another linear filter on the laterality-removed data and confirmed that the laterality coefficients were all zero.

804  
805

### Acknowledgements

806  
807  
808  
809  
810  
811  
812  
813

We thank participant T5 and his caregivers for their generously volunteered time and dedicated contributions to this research as part of the BrainGate2 pilot clinical trial, Sandrin Kosasih, Beverly Davis, and Kathy Tsou for administrative support, Erika Woodrum for the drawings in Figs. 1a, 3a, and Elias Stein for help in coding the data augmentation. Support provided by the NIH National Institute of Neurological Disorders and Stroke (U01-NS123101); NIH National Institute on Deafness and Other Communication Disorders (R01-DC014034); Wu Tsai Neurosciences Institute; Howard Hughes Medical Institute; Larry and Pamela Garlick; Office of Research and Development, Rehabilitation R&D Service, US Department of Veterans Affairs (A2295R, N2864C).

814  
815

### Competing interests

816  
817  
818  
819  
820

The MGH Translational Research Center has a clinical research support agreement with Neuralink, Synchron, Axoft, Precision Neuro, and Reach Neuro, for which L.R.H. provides consultative input. J.M.H. is a consultant for Neuralink and serves on the Medical Advisory Board of Enspire DBS. K.V.S. consulted for Neuralink and CTRL-Labs (part of Meta Reality Labs) and was on the scientific advisory boards of MIND-X, Inscopix and Heal. All other authors have no competing interests.

821  
822

### Author contributions

823

We have included a graphical representation of author contributions as a heatmap below:

824  
825  
826  
827  
828  
829  
830  
831  
832  
833  
834  
835  
836  
837  
838

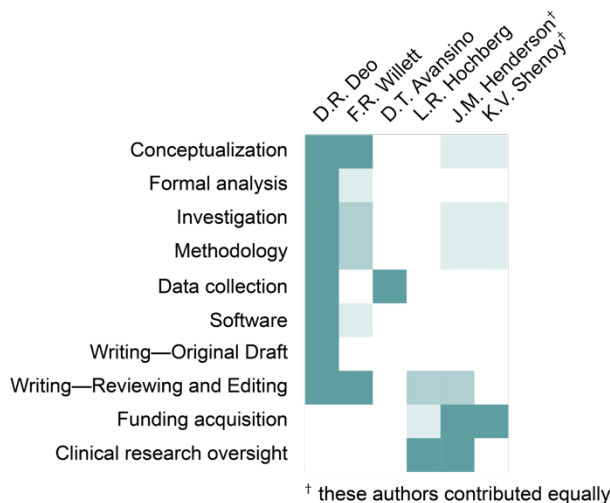

839 **References**

- 840 1. Sengupta, S. *et al.* A review of deep learning with special emphasis on architectures, applications and  
841 recent trends. *Knowledge-Based Systems* **194**, 105596 (2020).
- 842 2. Ciregan, D., Meier, U. & Schmidhuber, J. Multi-column deep neural networks for image classification.  
843 in *2012 IEEE Conference on Computer Vision and Pattern Recognition* 3642–3649 (2012).
- 844 3. Krizhevsky, A., Sutskever, I. & Hinton, G. E. ImageNet classification with deep convolutional neural  
845 networks. *Commun. ACM* **60**, 84–90 (2017).
- 846 4. Taigman, Y., Yang, M., Ranzato, M. 'aurelio & Wolf, L. DeepFace: Closing the gap to human-level  
847 performance in face verification. in *2014 IEEE Conference on Computer Vision and Pattern  
848 Recognition* 1701–1708 (IEEE, 2014).
- 849 5. Collobert, R. *et al.* Natural Language Processing (almost) from Scratch. *arXiv [cs.LG]* 2493–2537  
850 (2011).
- 851 6. Goldberg, Y. Neural Network Methods for Natural Language Processing. *Synthesis Lectures on  
852 Human Language Technologies* Preprint at <https://doi.org/10.1007/978-3-031-02165-7> (2017).
- 853 7. Collobert, R. & Weston, J. A unified architecture for natural language processing: deep neural  
854 networks with multitask learning. in *Proceedings of the 25th international conference on Machine  
855 learning* 160–167 (Association for Computing Machinery, 2008).
- 856 8. Punjani, A. & Abbeel, P. Deep learning helicopter dynamics models. in *2015 IEEE International  
857 Conference on Robotics and Automation (ICRA)* 3223–3230 (2015).
- 858 9. Lenz, I., Lee, H. & Saxena, A. Deep learning for detecting robotic grasps. *Int. J. Rob. Res.* **34**, 705–  
859 724 (2015).
- 860 10. Tedrake, R., Zhang, T. W. & Seung, H. S. Stochastic policy gradient reinforcement learning on a simple  
861 3D biped. in *2004 IEEE/RSJ International Conference on Intelligent Robots and Systems (IROS)*  
862 (*IEEE Cat. No.04CH37566*) vol. 3 2849–2854 vol.3 (2004).
- 863 11. Hochberg, L. R. *et al.* Reach and grasp by people with tetraplegia using a neurally controlled robotic  
864 arm. *Nature* **485**, 372–375 (2012).
- 865 12. Hochberg, L. R. *et al.* Neuronal ensemble control of prosthetic devices by a human with tetraplegia.  
866 *Nature* **442**, 164–171 (2006).
- 867 13. Collinger, J. L. *et al.* High-performance neuroprosthetic control by an individual with tetraplegia. *Lancet*  
868 **381**, 557–564 (2013).
- 869 14. Wodlinger, B. *et al.* Ten-dimensional anthropomorphic arm control in a human brain-machine interface:  
870 difficulties, solutions, and limitations. *J. Neural Eng.* **12**, 016011 (2015).
- 871 15. Ajiboye, A. B. *et al.* Restoration of reaching and grasping movements through brain-controlled muscle  
872 stimulation in a person with tetraplegia: a proof-of-concept demonstration. *Lancet* **389**, 1821–1830  
873 (2017).
- 874 16. Moritz, C. T., Perlmutter, S. I. & Fetz, E. E. Direct control of paralysed muscles by cortical neurons.  
875 *Nature* **456**, 639–642 (2008).
- 876 17. Ethier, C., Oby, E. R., Bauman, M. J. & Miller, L. E. Restoration of grasp following paralysis through  
877 brain-controlled stimulation of muscles. *Nature* **485**, 368–371 (2012).
- 878 18. O'Doherty, J. E. *et al.* Active tactile exploration using a brain-machine-brain interface. *Nature* **479**,  
879 228–231 (2011).
- 880 19. Bouton, C. E. *et al.* Restoring cortical control of functional movement in a human with quadriplegia.  
881 *Nature* **533**, 247–250 (2016).
- 882 20. Gilja\*, V. *et al.* Clinical translation of a high-performance neural prosthesis. *Nature Medicine* **21**, 1142–  
883 1145 (2015).
- 884 21. Pandarinath\*, C. *et al.* High performance communication by people with paralysis using an intracortical  
885 brain-computer interface. *Elife* **6**, (2017).

- 886 22. Nuyujukian\*, P. *et al.* Cortical control of a tablet computer by people with paralysis. *PLoS One* **13**,  
887 e0204566 (2018).
- 888 23. Stavisky, S. D. *et al.* Neural ensemble dynamics in dorsal motor cortex during speech in people with  
889 paralysis. *Elife* **8**, (2019).
- 890 24. Wilson, G. H. *et al.* Decoding spoken English from intracortical electrode arrays in dorsal precentral  
891 gyrus. *J. Neural Eng.* **17**, 066007 (2020).
- 892 25. Anumanchipalli, G. K., Chartier, J. & Chang, E. F. Speech synthesis from neural decoding of spoken  
893 sentences. *Nature* **568**, 493–498 (2019).
- 894 26. Moses, D. A. *et al.* Neuroprosthesis for decoding speech in a paralyzed person with anarthria. *N. Engl.*  
895 *J. Med.* **385**, 217–227 (2021).
- 896 27. Angrick, M. *et al.* Speech synthesis from ECoG using densely connected 3D convolutional neural  
897 networks. *J. Neural Eng.* **16**, 036019 (2019).
- 898 28. Willett, F. R., Avansino, D. T., Hochberg, L. R., Henderson, J. M. & Shenoy, K. V. High-performance  
899 brain-to-text communication via handwriting. *Nature* **593**, 249–254 (2021).
- 900 29. Pandarinath, C. *et al.* Latent Factors and Dynamics in Motor Cortex and Their Application to Brain–  
901 Machine Interfaces. *J. Neurosci.* **38**, 9390–9401 (2018).
- 902 30. Pandarinath, C. *et al.* Inferring single-trial neural population dynamics using sequential auto-encoders.  
903 *Nat. Methods* **15**, 805–815 (2018).
- 904 31. Keshtkaran, M. R. & Pandarinath, C. Enabling hyperparameter optimization in sequential  
905 autoencoders for spiking neural data. *Adv. Neural Inf. Process. Syst.* **32**, (2019).
- 906 32. Sussillo, D., Stavisky, S. D., Kao, J. C., Ryu, S. I. & Shenoy, K. V. Making brain–machine interfaces  
907 robust to future neural variability. *Nat. Commun.* **7**, 1–13 (2016).
- 908 33. Hosman, T. *et al.* BCI decoder performance comparison of an LSTM recurrent neural network and a  
909 Kalman filter in retrospective simulation. in *2019 9th International IEEE/EMBS Conference on Neural*  
910 *Engineering (NER)* 1066–1071 (IEEE, 2019).
- 911 34. Makin, J. G., O’Doherty, J. E., Cardoso, M. M. B. & Sabes, P. N. Superior arm-movement decoding  
912 from cortex with a new, unsupervised-learning algorithm. *J. Neural Eng.* **15**, 026010 (2018).
- 913 35. Burrow, M., Dugger, J., Humphrey, D. R., Reed, D. J. & Hochberg, L. R. Cortical control of a robot  
914 using a time-delay neural network.  
915 [https://citeseerx.ist.psu.edu/document?repid=rep1&type=pdf&doi=a41d8a4b13eac7b19b1aaedc6df4](https://citeseerx.ist.psu.edu/document?repid=rep1&type=pdf&doi=a41d8a4b13eac7b19b1aaedc6df4c846aa289212)  
916 [c846aa289212](https://citeseerx.ist.psu.edu/document?repid=rep1&type=pdf&doi=a41d8a4b13eac7b19b1aaedc6df4c846aa289212).
- 917 36. Sussillo, D. *et al.* A recurrent neural network for closed-loop intracortical brain-machine interface  
918 decoders. *J. Neural Eng.* **9**, (2012).
- 919 37. Willsey, M. S. *et al.* Real-time brain-machine interface in non-human primates achieves high-velocity  
920 prosthetic finger movements using a shallow feedforward neural network decoder. *Nat. Commun.* **13**,  
921 1–14 (2022).
- 922 38. Hochberg, L. R. *et al.* Reach and grasp by people with tetraplegia using a neurally controlled robotic  
923 arm. *Nature* **485**, 372 (2012).
- 924 39. Gilja, V. *et al.* A high-performance neural prosthesis enabled by control algorithm design. *Nat.*  
925 *Neurosci.* **15**, 1752 (2012).
- 926 40. Kao, J. C., Nuyujukian, P., Ryu, S. I. & Shenoy, K. V. A high-performance neural prosthesis  
927 incorporating discrete state selection with hidden Markov models. *IEEE Transactions on Biomedical*  
928 *Engineering* **64**, 935–945 (2016).
- 929 41. Downey, J. E. *et al.* The Motor Cortex Has Independent Representations for Ipsilateral and  
930 Contralateral Arm Movements But Correlated Representations for Grasping. *Cerebral Cortex* vol. 30  
931 5400–5409 Preprint at <https://doi.org/10.1093/cercor/bhaa120> (2020).
- 932 42. Nason, S. R. *et al.* Real-time linear prediction of simultaneous and independent movements of two



- 933 finger groups using an intracortical brain-machine interface. *Neuron* **109**, 3164–3177.e8 (2021).
- 934 43. Kim, S. P., Simeral, J. D., Hochberg, L. R., Donoghue, J. P. & Black, M. J. Neural control of computer  
935 cursor velocity by decoding motor cortical spiking activity in humans with tetraplegia. *J. Neural Eng.* **5**,  
936 455–476 (2008).
- 937 44. Cunningham, J. P. & Yu, B. M. Dimensionality reduction for large-scale neural recordings. *Nat.*  
938 *Neurosci.* **17**, 1500–1509 (2014).
- 939 45. Gallego, J. A., Perich, M. G., Miller, L. E. & Solla, S. A. Neural Manifolds for the Control of Movement.  
940 *Neuron* **94**, 978–984 (2017).
- 941 46. Ifft, P. J., Shokur, S., Li, Z., Lebedev, M. A. & Nicolelis, M. A. L. A brain-machine interface enables  
942 bimanual arm movements in monkeys. *Sci. Transl. Med.* **5**, 210ra154 (2013).
- 943 47. Rokni, U., Steinberg, O., Vaadia, E. & Sompolinsky, H. Cortical representation of bimanual  
944 movements. *J. Neurosci.* **23**, 11577–11586 (2003).
- 945 48. Steinberg, O. *et al.* Neuronal populations in primary motor cortex encode bimanual arm movements.  
946 *Eur. J. Neurosci.* **15**, 1371–1380 (2002).
- 947 49. Diedrichsen, J., Wiestler, T. & Krakauer, J. W. Two distinct ipsilateral cortical representations for  
948 individuated finger movements. *Cereb. Cortex* **23**, 1362–1377 (2013).
- 949 50. Willett, F. R. *et al.* Hand Knob Area of Premotor Cortex Represents the Whole Body in a Compositional  
950 Way. *Cell* **181**, 396–409.e26 (2020).
- 951 51. Lai, D. *et al.* Neuronal representation of bimanual arm motor imagery in the motor cortex of a  
952 tetraplegia human, a pilot study. *Front. Neurosci.* **17**, 1133928 (2023).
- 953 52. Benabid, A. L. *et al.* An exoskeleton controlled by an epidural wireless brain–machine interface in a  
954 tetraplegic patient: a proof-of-concept demonstration. *Lancet Neurol.* **18**, 1112–1122 (2019).
- 955 53. Wisneski, K. J. *et al.* Unique cortical physiology associated with ipsilateral hand movements and  
956 neuroprosthetic implications. *Stroke* **39**, 3351–3359 (2008).
- 957 54. Glaser, J. I. *et al.* Machine learning for neural decoding. *eNeuro* **7**, 1–16 (2020).
- 958 55. Liu, F. *et al.* Deep learning for neural decoding in motor cortex. *J. Neural Eng.* **19**, (2022).
- 959 56. Wang, Y., Truccolo, W. & Borton, D. A. Decoding hindlimb kinematics from primate motor cortex using  
960 long short-term memory recurrent neural networks. *Conf. Proc. IEEE Eng. Med. Biol. Soc.* **2018**, 1944–  
961 1947 (2018).
- 962 57. Kobak, D. *et al.* Demixed principal component analysis of neural population data. *Elife* **5**, e10989–  
963 e10989 (2016).
- 964 58. Willett, F. R. *et al.* Feedback control policies employed by people using intracortical brain-computer  
965 interfaces. *J. Neural Eng.* **14**, 16001 (2017).
- 966 59. Wessberg, J. *et al.* Real-time prediction of hand trajectory by ensembles of cortical neurons in  
967 primates. *Nature* **408**, 361 (2000).
- 968 60. Chapin, J. K., Moxon, K. A., Markowitz, R. S. & Nicolelis, M. A. L. Real-time control of a robot arm  
969 using simultaneously recorded neurons in the motor cortex. *Nat. Neurosci.* **2**, 664 (1999).
- 970 61. Naufel, S., Glaser, J. I., Kording, K. P., Perreault, E. J. & Miller, L. E. A muscle-activity-dependent gain  
971 between motor cortex and EMG. *J. Neurophysiol.* **121**, 61–73 (2019).
- 972 62. Xu, K. *et al.* Comparisons between linear and nonlinear methods for decoding motor cortical activities  
973 of monkey. *Conf. Proc. IEEE Eng. Med. Biol. Soc.* **2011**, 4207–4210 (2011).
- 974 63. Haghi, B. *et al.* Deep multi-state dynamic recurrent neural networks operating on wavelet based neural  
975 features for robust brain machine interfaces. *bioRxiv* (2019) doi:10.1101/710327.
- 976 64. Carmena, J. M. *et al.* Learning to control a brain-machine interface for reaching and grasping by  
977 primates. *PLoS Biol.* **1**, E42 (2003).
- 978 65. Deo, D. R. *et al.* Effects of Peripheral Haptic Feedback on Intracortical Brain-Computer Interface  
979 Control and Associated Sensory Responses in Motor Cortex. *IEEE Trans. Haptics* **14**, 762–775

- 980 (2021).  
981 66. Cisek, P., Crammond, D. J. & Kalaska, J. F. Neural activity in primary motor and dorsal premotor  
982 cortex in reaching tasks with the contralateral versus ipsilateral arm. *J. Neurophysiol.* **89**, 922–942  
983 (2003).  
984 67. Bundy, D. T., Szrama, N., Pahwa, M. & Leuthardt, E. C. Unilateral, 3D arm movement kinematics are  
985 encoded in ipsilateral human cortex. *Journal of Neuroscience* **38**, 10042–10056 (2018).  
986 68. Trautmann, E. M. *et al.* Accurate Estimation of Neural Population Dynamics without Spike Sorting.  
987 *Neuron* **103**, 292–308.e4 (2019).  
988 69. Fraser, G. W., Chase, S. M., Whitford, A. & Schwartz, A. B. Control of a brain–computer interface  
989 without spike sorting. *J. Neural Eng.* **6**, 055004 (2009).  
990 70. Todorova, S., Sadtler, P., Batista, A., Chase, S. & Ventura, V. To sort or not to sort: the impact of  
991 spike-sorting on neural decoding performance. *J. Neural Eng.* **11**, 056005 (2014).  
992 71. Willett, F. R. *et al.* A comparison of intention estimation methods for decoder calibration in intracortical  
993 brain-computer interfaces. *IEEE Transactions on Biomedical Engineering* **65**, 2066–2078 (2018).  
994 72. Velliste, M., Perel, S., Spalding, M. C., Whitford, A. S. & Schwartz, A. B. Cortical control of a prosthetic  
995 arm for self-feeding. *Nature* **453**, 1098–1101 (2008).  
996 73. Jarosiewicz, B. *et al.* Virtual typing by people with tetraplegia using a self-calibrating intracortical brain-  
997 computer interface. *Sci. Transl. Med.* **7**, 313ra179 (2015).  
998 74. Perge, J. A. *et al.* Intra-day signal instabilities affect decoding performance in an intracortical neural  
999 interface system. *J. Neural Eng.* **10**, 036004 (2013).

1000  
1001  
1002  
1003  
1004  
1005  
1006  
1007  
1008  
1009  
1010  
1011  
1012  
1013  
1014  
1015  
1016  
1017  
1018  
1019  
1020  
1021  
1022  
1023  
1024  
1025  
1026

1027 **Supplementary Figures & Tables**

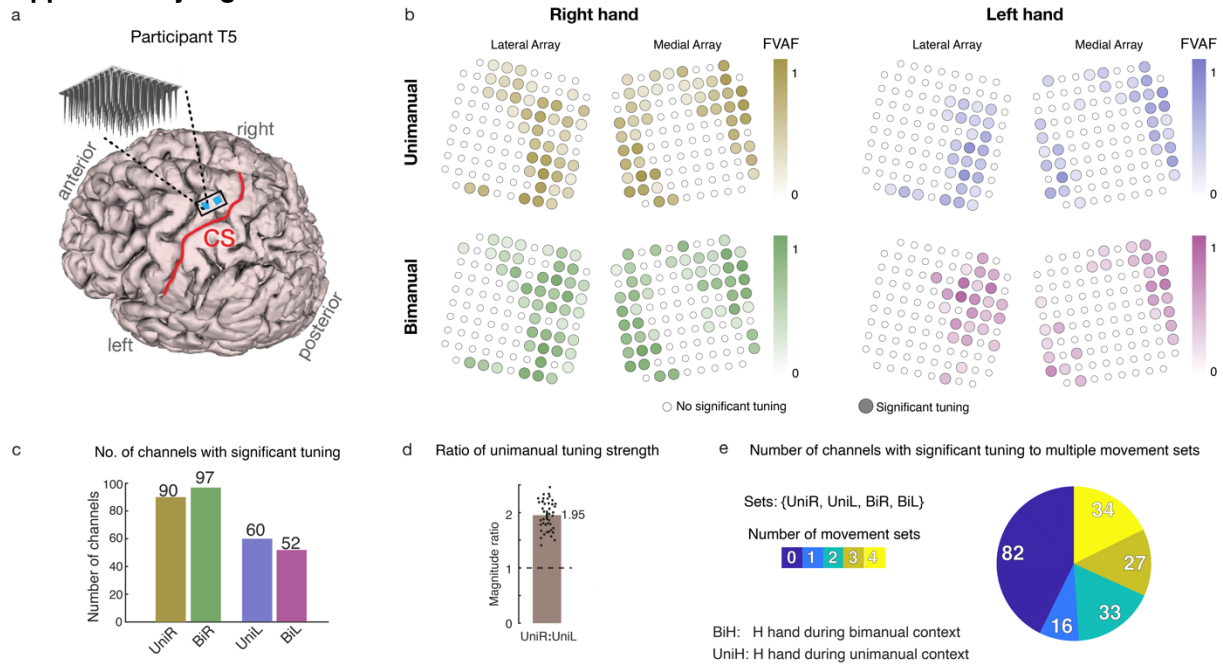

1028 **Supplementary Fig. 1 | Tuning to unimanual and bimanual movement is intermixed within electrodes**  
 1029 **and has no clear somatotopic pattern.**

1030 **a** Participant T5's MRI-derived brain anatomy and microelectrode  
 1031 array locations. Microelectrode array locations were determined by co-registration of post-operative  
 1032 computed tomography (CT) images with preoperative MRI images. **b** The strength of each electrodes'  
 1033 tuning to right or left hand movement during unimanual and bimanual movement contexts is indicated with  
 1034 a shaded color (darker colors indicate more tuning). Tuning strength was quantified as the fraction of total  
 1035 firing rate variance accounted for by changes in firing rate due to the movement conditions  
 1036 (unimanual/bimanual). Small white circles indicate electrodes that had no significant tuning to that  
 1037 movement context as governed by a 1-way ANOVA. Broad spatial tuning to all movement categories can  
 1038 be seen across all arrays. **c** Bar plots indicate the number of electrodes that were significantly tuned to  
 1039 each movement context as computed in (a). Results show greater preference for right hand tuning across  
 1040 both movement contexts. **d** Ratio of unimanual tuning strength between the right and left hand. Tuning  
 1041 strength was computed using an unbiased estimate of neural distance between tuning coefficient vectors.  
 1042 The right hand had almost twice as strong tuning than the left hand. **e** Pie chart summarizes the number of  
 1043 electrodes that had statistically significant tuning to each possible number of movement sets (from 0 to 4).  
 1044  
 1045  
 1046  
 1047  
 1048

a RNN architecture

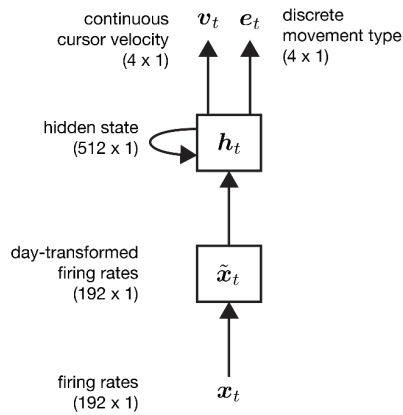

1049  
1050  
1051  
1052  
1053  
1054  
1055  
1056  
1057  
1058  
1059  
1060  
1061  
1062  
1063  
1064  
1065  
1066  
1067  
1068  
1069  
1070  
1071  
1072  
1073  
1074  
1075  
1076  
1077  
1078

**Supplementary Fig. 2 | Diagram of the RNN architecture.** a We used a single-layer RNN with 512 gated recurrent units (GRUs;  $h_t$ ) to transform neural firing rates ( $x_t$ ) binned in 20 ms to continuous cursor velocities ( $v_t$ ) and discrete movement signals ( $e_t$ ). The  $v_t$  vector describes the x- and y-direction velocities for the right (first two dimensions) and left (last two dimensions) cursors at that moment in time ( $t$ ), and  $e_t$  is a one-hot vector (only one dimension is high at any given time) which codes for the type of movement that the RNN detects (unimanual right, unimanual left, bimanual, or no movement) at that time point. Note that we used a day-specific affine transform on the input firing rate vector  $x_t$  to account for day-to-day changes in neural activity.



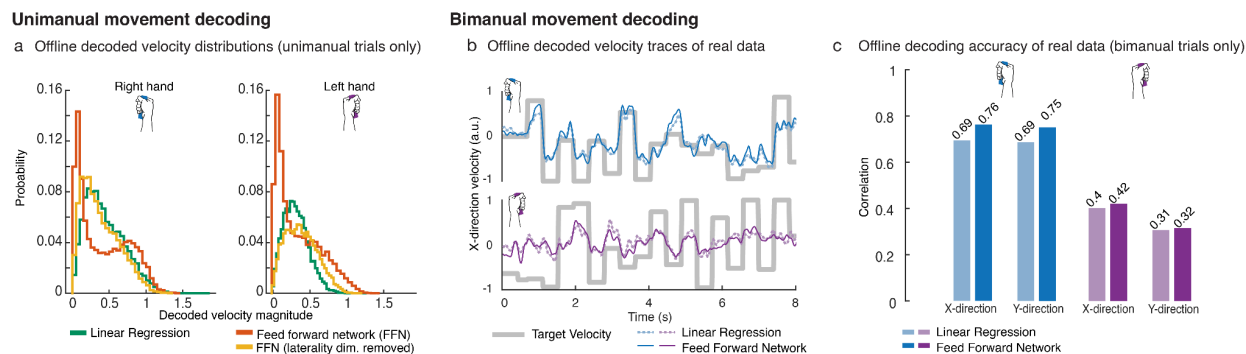

1079  
1080 **Supplementary Fig. 3 | Offline unimanual and bimanual decoding.** **a** Distributions of decoded velocity  
1081 magnitudes during unimanual movement (related to Fig. 5a,b). The feed forward neural network (FFN) was  
1082 able to decode higher velocity magnitudes than the linear decoder. Removal of the laterality dimension  
1083 resulted in less decoded velocities near 0 for the FFN, indicating worse cursor stillness without laterality  
1084 information. **b** Offline single-bin decoding on bimanual data. Neural activity was binned (20-ms bins) and  
1085 truncated to 400 ms movement windows (300-700 ms after go cue). Linear ridge regression (RR) and a  
1086 densely connected FFN (single layer, 512 units) were trained, using 5-fold cross-validation, to decode left  
1087 and right cursor velocities. Sample 8 s snippets of decoded x-direction velocity traces are shown. **c** Each  
1088 bar indicates the offline decoding performance (Pearson correlation coefficient) for the RR and FFN  
1089 decoders across the x- and y-direction velocity dimensions. Generally, right hand decoding accuracy was  
1090 higher than left hand decoding accuracy during bimanual movement.

1091  
1092  
1093  
1094  
1095  
1096  
1097  
1098  
1099  
1100  
1101  
1102  
1103  
1104  
1105  
1106  
1107  
1108

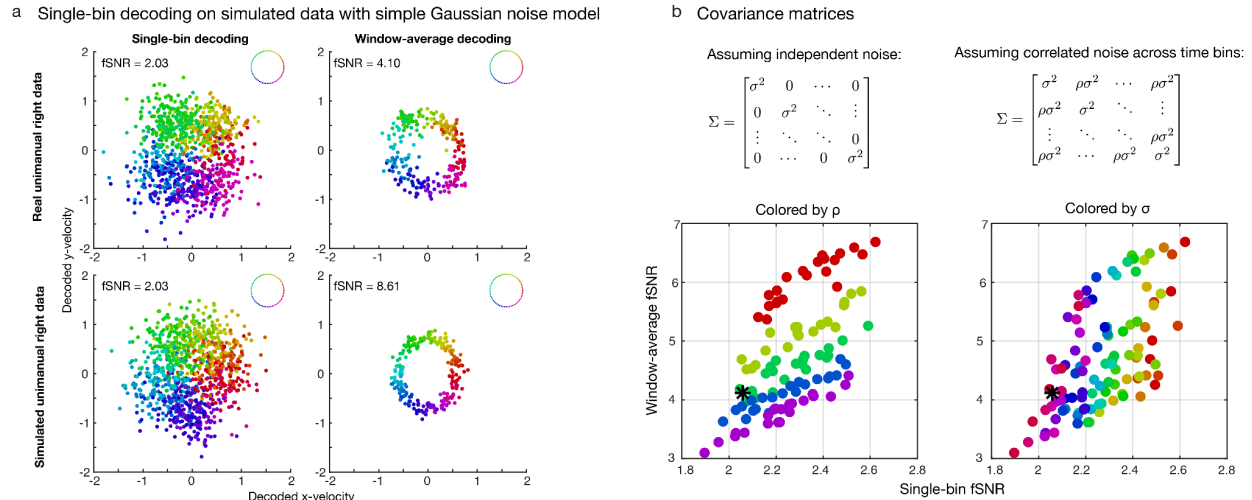

1109

1110

**Supplementary Fig. 4 | Decoding simulated data with a simple Gaussian noise model.** **a** Using a functional signal-to-noise ratio (fSNR; see Methods) metric, we quantify single-bin and window-average decoding performance on real data (top row) and simulated data (bottom row). The simulated data was created using a simple Gaussian noise model (using the left covariance matrix in **b**) which assumes independence between firing rates across time bins for any given electrode channel. Decoders were built using cross-validated linear regression on 20-ms binned data in the movement window from 300 to 700 ms after the go cue of each trial. The single-bin decoders were calibrated on each 20-ms bin of data, whereas the window-average decoders were calibrated on the averaged activity within the 400-ms window. Each dot represents the decoded x- and y-direction velocity in either each 20-ms time bin (left column) or each 400-ms window of a trial (right column). The color of each dot corresponds to the true target direction of movement indicated by the keys in the upper right of each panel. In this example, the simulated data was generated to match the single-bin fSNR of real unimanual right hand movement data (2.03). Notice that although the single-bin fSNRs of both the real and simulated datasets match, the window-average fSNRs differ quite significantly. **b** The simple gaussian model on the left assumes independent noise, whereas the covariance matrix on the right assumes correlated noise across time bins.  $\sigma$  is the standard deviation, and  $\rho$  is the correlation coefficient. **c** In order to match the window-average fSNR, one could use the correlated noise model and sweep the covariance parameters until a window-average fSNR is met. The scatter plots indicate the single-bin and window-average fSNRs of synthetic datasets created by sweeping a range of both  $\sigma$  and  $\rho$  parameters in the Gaussian model with correlated noise. Black stars indicate the real data's single-bin and window-average fSNR as seen in panel **a**. Both plots are identical except for the way in which the points are colored. The plot on the left is colored according to the  $\rho$  value, and the plot on the right is colored by the  $\sigma$  value. Notice that the correlated noise ( $\rho$  parameter) mainly affects the window-average fSNR and the single-bin SNR is mainly affected by the standard deviation parameter  $\sigma$ . With our focus on single-bin decoding, the simple Gaussian noise model was sufficient when generating synthetic datasets.

1135

1136

1137

1138

1139

1140

1141

1142

1143

1144

1145

1146

| X-direction | UniL-BiL                       | UniR-UniL                      | BiR-BiL                        |
|-------------|--------------------------------|--------------------------------|--------------------------------|
| UniR-BiR    | <b>7.82 x 10<sup>-10</sup></b> | <b>4.89 x 10<sup>-40</sup></b> | <b>2.39 x 10<sup>-11</sup></b> |
| UniL-BiL    |                                | <b>3.4 x 10<sup>-21</sup></b>  | 0.05                           |
| UniR-UniL   |                                |                                | <b>1.04 x 10<sup>-12</sup></b> |

1147

| Y-direction | UniL-BiL                     | UniR-UniL                      | BiR-BiL                        |
|-------------|------------------------------|--------------------------------|--------------------------------|
| UniR-BiR    | <b>3.3 x 10<sup>-9</sup></b> | <b>9.32 x 10<sup>-27</sup></b> | <b>4.0 x 10<sup>-16</sup></b>  |
| UniL-BiL    |                              | 0.76                           | <b>3.28 x 10<sup>-6</sup></b>  |
| UniR-UniL   |                              |                                | <b>8.51 x 10<sup>-13</sup></b> |

1148 **Supplemental Table 1 | Two-sample T-tests for significance between tuning correlations.** These p-  
 1149 values correspond to the bar plots in Figure 2c. Bolded entries indicate significance as any value below  
 1150 0.01. BiH denotes H hand during the bimanual context, and UniH denotes H hand during the unimanual  
 1151 context.

1152  
 1153  
 1154  
 1155  
 1156  
 1157  
 1158  
 1159  
 1160  
 1161  
 1162  
 1163  
 1164  
 1165  
 1166  
 1167  
 1168  
 1169  
 1170  
 1171  
 1172  
 1173  
 1174  
 1175  
 1176  
 1177  
 1178  
 1179  
 1180  
 1181  
 1182  
 1183  
 1184

| Date       | Session # | Trial day | Description                                                                                                                         | Figure / Movie                               |
|------------|-----------|-----------|-------------------------------------------------------------------------------------------------------------------------------------|----------------------------------------------|
| 06.02.2021 | 320       | 1750      | Cued unimanual and bimanual hand movement                                                                                           | Fig 1b,c<br>SFig 1b,c,e                      |
| 06.04.2021 | 321       | 1752      | Cued unimanual and bimanual hand movement (pilot data used to initially calibrate RNNs for closed-loop)                             | Fig 4a-c                                     |
| 06.23.2021 | 324       | 1771      | Cued unimanual and bimanual hand movement (pilot data used to initially calibrate RNNs for closed-loop)                             | Fig 4a-c                                     |
| 06.28.2021 | 325       | 1776      | Cued unimanual and bimanual hand movement, closed-loop two-cursor control                                                           | Fig 2b-d<br>Fig 4a<br>SFig 1d                |
| 06.30.2021 | 326       | 1778      | Cued unimanual and bimanual hand movement, closed-loop two-cursor control                                                           | Fig 2b-d<br>Fig 4a<br>SMovie 1               |
| 07.12.2021 | 329       | 1790      | Cued unimanual and bimanual hand movement, closed-loop two-cursor control                                                           | Fig 4a                                       |
| 07.14.2021 | 330       | 1792      | Cued unimanual and bimanual hand movement, closed-loop two-cursor control                                                           | Fig 2b-d<br>Fig 4a                           |
| 09.13.2021 | 336       | 1853      | Cued unimanual and bimanual hand movement, closed-loop two-cursor control (RNN vs. linear regression)                               | Fig 4c                                       |
| 09.15.2021 | 337       | 1855      | Cued unimanual and bimanual hand movement, closed-loop two-cursor control (RNN vs. linear regression), 'Unimanual task' variant     | Fig 4c<br>SMovie 3                           |
| 09.27.2021 | 340       | 1867      | Cued unimanual and bimanual hand movement, closed-loop two-cursor control (augmented vs. non-augmented training data)               | Fig 3e<br>Fig 5a-c<br>SFig 3a-c              |
| 09.29.2021 | 341       | 1869      | Cued unimanual and bimanual hand movement, closed-loop two-cursor control (augmented vs. non-augmented training data)               | Fig 3d-e<br>SMovie 4                         |
| 10.11.2021 | 344       | 1881      | Cued unimanual and bimanual hand movement, closed-loop two-cursor control (sequential unimanual vs. simultaneous bimanual strategy) | Fig 2b-d<br>Fig 4a-b                         |
| 10.13.2021 | 345       | 1883      | Cued unimanual and bimanual hand movement, closed-loop two-cursor control (sequential unimanual vs. simultaneous bimanual strategy) | Fig 2b-d<br>Fig 4a-b<br>Fig 5a-c<br>SMovie 2 |

1185 **Supplemental Table 2 | List of data collection sessions with participant t5.** The trial day refers to the  
 1186 post-implant day.

1187  
1188 **Supplemental Movie 1 | Simultaneous bimanual control of two cursors via RNN decoding.** In this  
1189 movie, participant T5 uses a BCI to control two cursors in real-time to targets on a computer monitor. An  
1190 RNN converts neural activity into velocities for both cursors at each timestep. On each trial, one of three  
1191 movement types are cued randomly: (1) bimanual (simultaneous movement of both cursors), (2) unimanual  
1192 right (only right cursor movement), or (3) unimanual left (only left cursor movement). Each trial begins with  
1193 a 'prepare' segment (of random duration) where lines connect each cursor to its intended target. T5  
1194 prepares to move during this segment but does not attempt movement until the lines disappear, indicating  
1195 the 'go' cue. Successful target acquisition occurs when both cursors simultaneously dwell within their  
1196 designated target (illuminates blue) for an uninterrupted period of 0.5 s. A trial times out at a maximum of  
1197 10 s. The RNN decoder is enabled at all times. This experiment block was recorded during a performance  
1198 evaluation session reported in Figure 4 (trial day 1778).

1199 **Supplemental Movie 2 | Sequential unimanual movement vs. simultaneous bimanual movement.**  
1200 The same as Supplemental Movie 1, except T5 uses two different movement strategies: (1) sequential  
1201 unimanual (moving one cursor at a time), and (2) simultaneous bimanual (moving both cursors  
1202 simultaneously). A separate RNN decoder is used for each movement strategy. The RNN used for the  
1203 simultaneous bimanual strategy is trained normally (just like in supplemental video 1) with both unimanual  
1204 and bimanual data. The RNN used for the sequential unimanual strategy is trained only with unimanual  
1205 trials. Both experiment blocks were recorded during a performance evaluation session reported in Figure  
1206 4b (trial day 1883).

1207 **Supplemental Movie 3 | RNN vs. linear decoder for two-cursor control.** The same as Supplemental  
1208 Movie 1, except with only unimanual trials. An RNN decoder is compared to a linear decoder for online  
1209 control of two cursors. This task was limited to unimanual trials to focus on the differences between  
1210 decoders. Both experiment blocks were recorded during a performance evaluation session reported in  
1211 Figure 4c (trial day 1855).

1212 **Supplemental Movie 4 | Online two-cursor control with raw and temporally altered training data.**  
1213 Same as Supplemental Movie 1, except with only unimanual trials. During this task, one cursor is cued on  
1214 any given trial where the other cursor stays 'locked' in place. This version of the task was used to focus on  
1215 the differences between decoders. One decoder was trained with raw training data and the other decoder  
1216 was trained with temporally altered training data. Both experiment blocks were recorded during a  
1217 performance evaluation session reported in Figure 3e (trial day 1869).
